# Supplementary material for: Hydrogel scaffolds promote neural gene expression and structural reorganization in human astrocyte cultures
Source: PeerJ. 2017 Jan 11;5:e2829. doi: 10.7717/peerj.2829 (PMC5234438; doi:10.7717/peerj.2829)
Supplement: File S4 — Normalized FPKM values for monolayer and matrix samples. Noncoding RNA sequences removed from downstream analyses [file peerj-05-2829-s004.csv]

tracking_id	MonolayerA_ln1	MonolayerB_ln1	MonolayerA_ln2	MonolayerB_ln2	MatrixA_ln1	MatrixB_ln1	MatrixA_ln2	MatrixB_ln2
LINC00028	0	0.11	0	0.05	0	0	0	0
LINC00029	0	0	0	0	0	0	0	0
LINC00032	0.01	0	0	0	0	0	0	0
LINC00051	0	0	0	0	0	0	0	0
LINC00052	0.16	0.17	0.11	0.17	0.0355169	0.0451567	0.0538757	0.0333535
LINC00085	2.66	2.97	2.36	2.61	2.26158	1.70383	2.41985	1.9849
LINC00086	0.04	0.21	0.04	0.2	0.0851063	0.941518	0.088005	0.944698
LINC00087	0.41	0.41	0.37	0.34	0.865886	0.623812	0.881412	0.566071
LINC00092	0.02	0.16	0	0	0	0.120172	0.050332	0.136101
LINC00094	4.62	4.35	4.79	4.34	6.09682	5.3003	6.11802	5.31775
LINC00102	0.04	0.02	0.07	0.03	0.0903584	0.032752	0.0290989	0.0180275
LINC00111	0	0	0	0	0	0	0	0
LINC00112	0	0	0	0	0	0	0	0
LINC00113	0	0	0	0	0	0	0	0
LINC00114	0.06	0	0	0	0	0	0	0
LINC00115	1.46	1.41	0.95	0.78	0.42172	0.573835	0.610824	0.872413
LINC00116	4.02	3.32	3.72	3.23	3.29722	2.82582	3.20793	2.78494
LINC00152	144.18	144.75	132.9	141.32	127.957	80.1614	136.883	80.357
LINC00158	0	0	0.02	0	0	0	0	0.0166448
LINC00159	0	0	0	0	0	0	0	0
LINC00160	0	0.04	0	0	0	0	0	0
LINC00161	0	0	0	0.05	0.0842268	0.118203	0.119119	0.0293721
LINC00162	0	0.33	0.06	0.19	0.182879	0.10732	0.210282	0.0812798
LINC00163	0.01	0	0	0.01	0	0	0	0
LINC00167	0.01	0.03	0.01	0.03	0.013741	0.0756448	0.00782003	0.0375689
LINC00173	0.19	0.36	0.05	0.35	0.145942	0.15572	0.118001	0.275764
LINC00174	0.44	1.08	0.5	1.01	0.476952	1.2082	0.56763	1.24283
LINC00176	0.05	0.09	0.03	0.01	0.0275266	0.0827657	0.0181661	0.0689249
LINC00184	0.06	0.02	0.1	0.03	0.0154728	0.0194521	0.00882195	0.0108289
LINC00189	0.31	0.21	0.18	0.04	0.0628631	0.122417	0.178375	0.180742
LINC00200	0	0.01	0	0	0	0	0	0
LINC00202	0.03	0.04	0.02	0.05	0.0195306	0.0840705	0.0223625	0.0472375
LINC00204B	0.18	0.31	0.16	0.2	0	0.0823246	0.0382699	0.183875
LINC00207	0	0	0	0	0	0	0	0
LINC00208	0	0	0	0	0	0	0	0
LINC00221	0	0	0	0	0	0	0	0
LINC00222	0	0	0	0	0	0	0	0.028473
LINC00226	0	0	0	0	0	0	0	0
LINC00229	0	0	0	0	0	0	0	0
LINC00230A	0	0.1	0	0	0	0	0	0
LINC00230B	0	0	0	0	0	0	0	0
LINC00235	0.38	0.33	0.28	0.52	0.704951	0.267312	0.33696	0.458208
LINC00238	0	0	0	0	0	0	0	0
LINC00239	0.08	0	0.1	0.04	0	0	0	0
LINC00240	0.02	0.19	0.1	0.16	0.0215775	0.213848	0.0242266	0.147224
LINC00242	0.04	0.13	0.1	0.11	0.0664161	0.150091	0.0948371	0.0652484
LINC00244	0.04	0.1	0.04	0.05	0.0392641	0.0483344	0	0
LINC00246B	0.02	0.26	0.02	0.19	0.0193006	0.177339	0	0.252676
LINC00251	0	0	0	0	0	0	0	0
LINC00254	0	0	0	0	0	0	0	0
LINC00256A	0.34	0.16	0.34	0.14	0.567511	0.476669	0.592346	0.515307
LINC00256B	0.25	0.15	0.26	0.15	0.526522	0.377506	0.485604	0.426531
LINC00260	0.23	0.37	0.28	0.16	0.338955	0.183467	0.0923012	0.159529
LINC00261	0	0	0	0	0	0	0	0
LINC00263	1.82	2.06	1.6	0.97	1.35706	1.80652	1.09718	1.5137
LINC00264	0	0	0	0	0	0	0	0
LINC00265	1.18	2.11	0.79	1.03	0.771025	0.999805	1.02979	1.75765
LINC00266-1	0.11	0.1	0.02	0.06	0.0230589	0.0184821	0.0637108	0.143888
LINC00271	0.04	0.06	0.07	0.11	0.0824121	0.0743507	0.107399	0.214737
LINC00272	0	0	0	0	0	0	0.0289147	0
LINC00273	0.51	0.73	0	0	0	0	0.368393	0.2922
LINC00277	0.02	0.1	0.01	0.07	0.0271176	0.0842955	0.0542182	0.141341
LINC00281	0	0	0	0	0	0	0	0
LINC00282	0.01	0.02	0.01	0.01	0.00455775	0	0.0156366	0.02535
LINC00284	0.01	0.08	0.01	0.06	0.0287975	0.128199	0.0245827	0.121784
LINC00290	0	0	0	0	0	0	0	0
LINC00293	0	0	0	0	0	0	0	0
LINC00294	2.21	3.15	2.27	3.22	2.50558	2.82601	2.59563	3.18881
LINC00299	0	0.01	0	0	0	0	0.0317731	0
LINC00301	0	0	0	0	0	0	0	0
LINC00303	0	0	0	0	0	0	0	0
LINC00304	0.06	0.04	0.08	0.04	0.117179	0.0212738	0.0727119	0.0604798
LINC00305	0	0	0.02	0	0	0	0	0
LINC00307	0	0	0	0	0	0	0	0
LINC00308	0	0	0	0	0	0	0	0
LINC00309	0.01	0	0	0	0	0	0	0
LINC00310	0.06	0.09	0.12	0.02	0.0884066	0.110962	0.139233	0.17078
LINC00311	0.07	0.03	0	0.01	0.0106677	0.0130334	0.0121822	0.0146224
LINC00312	0.39	1.67	0.44	1.51	0.463529	1.14696	0.424631	1.35753
LINC00313	0.05	0.51	0.04	0.72	0.124536	0.30282	0.0474308	0.625364
LINC00314	0	0	0	0	0	0	0	0
LINC00315	0.01	0.01	0.03	0.04	0.00847418	0.0299895	0.0585002	0.0227332
LINC00317	0	0	0	0	0	0	0	0
LINC00319	0.04	0.18	0.04	0.13	0.0671812	0.0867864	0.0388034	0.0812266
LINC00320	0	0	0	0	0	0	0	0
LINC00323	0	0.05	0.01	0.08	0.00962067	0.0590987	0.0330028	0.0396533
LINC00324	0.32	0.29	0.24	0.27	0.23868	0.461421	0.195686	0.414142
LINC00326	0.01	0.04	0	0	0	0	0	0
LINC00327	1.27	1.48	1.32	1.65	1.17454	0.742313	1.19808	0.698558
LINC00330	0	0.05	0.01	0.02	0.0164063	0	0.0280614	0
LINC00336	0	0	0.01	0.01	0.0258467	0	0	0.0118368
LINC00338	1.56	2.85	1.63	2.78	1.46448	2.72424	1.38321	2.94826
LINC00339	3.48	3.5	3.24	2.98	3.86533	3.54127	4.17455	4.71972
LINC00340	0.49	2.36	0.48	1.97	1.1681	2.52655	1.07298	3.65328
LINC00341	0.42	0.12	0.39	0.09	0.792531	0.166375	0.746113	0.159965
LINC00346	0.74	0.32	0.69	0.33	0.945071	0.576534	0.96484	0.61153
LINC00347	0	0	0	0	0.0087389	0	0.00992098	0
LINC00410	0	0	0	0	0	0	0	0
LINC00421	0	0	0	0	0	0	0	0
LINC00426	0.04	0.02	0.04	0	0.0393942	0	0.0448735	0
LINC00442	0	0	0	0	0	0	0	0
LINC00460	2.86	1.75	2.81	1.93	2.68031	1.05687	2.80456	1.14884
LINC00461	1.11	10.84	0.88	10.74	1.58678	16.4755	1.75496	16.755
LINC00466	0	0.01	0	0	0	0	0	0
LINC00467	3.63	4.22	4.26	3.54	2.65629	3.21556	2.56134	3.61186
LINC00469	0	0	0	0	0	0	0	0
LINC00470	0	0	0.01	0	0.010286	0	0.011644	0
LINC00471	0.07	0.21	0.03	0.11	0	0.0776928	0.107163	0.130226
LINC00472	0.97	1.49	0.78	1.42	0.770931	0.997009	0.811254	1.01716
LINC00473	0.07	0.09	0.05	0.04	0.304116	0.324262	0.280537	0.463593
LINC00474	0	0	0	0	0	0	0	0
LINC00475	0.2	0.49	0.13	0.37	0.435179	0.77168	0.520272	0.917038
LINC00476	1.54	1.62	1.19	1.5	1.20178	1.54078	1.1651	1.7546
LINC00477	0.01	0.02	0	0	0	0	0	0
LINC00478	0.67	1.88	0.76	1.64	0.456132	2.11832	0.415809	2.3591
LINC00479	0	0.02	0	0	0.0266955	0	0.0204335	0
LINC00482	0.01	0	0.01	0	0	0	0	0
LINC00483	0	0	0	0	0	0	0	0
LINC00485	0	0	0	0	0	0	0.0119238	0
LINC00486	0	0	0	0	0	0	0	0
LINC00487	0.03	0	0.01	0	0	0.010639	0	0
LINC00488	0	0.03	0	0.01	0.00750836	0.0190262	0.0340867	0.0736069
LINC00493	41.71	36.03	30.53	27.26	34.8758	26.0475	41.4804	36.0327
LINC00494	0	0.01	0	0.01	0	0	0	0
LINC00511	0.03	0.15	0.06	0.15	0.0340972	0.0742295	0.0681372	0.0355013
LINC00514	0.01	0.01	0.01	0	0	0	0.0615997	0.0293788
LINC00515	0	0.26	0.06	0.16	0.0686394	0.336323	0.312228	0.467694
LINC00518	0.01	0	0	0.01	0	0	0	0
LINC00520	0.01	0.02	0.05	0.01	0.248089	0.0448245	0.398733	0.116378
LINC00521	0	0	0	0	0	0	0	0
LINC00523	0	0	0	0	0	0.0130008	0	0
LINC00525	0.08	0.14	0.14	0.02	0.0550804	0.0913919	0.167173	0.0254167
LINC00526	1.14	1.42	1.39	1.19	0.929176	1.93429	1.15464	1.48705
LINC00535	0.09	0.13	0.12	0.18	0.0377736	0.174065	0.129513	0.246934
LINC00536	0	0	0	0	0.0172088	0.0291096	0.0326039	0
LINC00538	0	0	0	0	0	0	0	0
LINC00547	0.56	0.67	0.65	0.62	0.345999	0.268727	0.495341	0.375624
LINC00548	0	0.01	0	0	0	0	0.00852682	0.0104424
LINC00550	0	0	0	0	0	0	0	0
LINC00552	0	0.02	0	0.02	0.00625922	0	0	0
LINC00574	0	0	0	0.01	0.0161029	0.00979974	0.00926395	0.0240712
LINC00575	0	0	0	0	0	0	0	0
LPP-AS2	NA	1.17	0.7	1.07	1.00539	1.06018	0.980319	1.18357
LSAMP-AS3	0	0	0	0	0	0	0	0
LY86-AS1	0	0	0	0	0	0	0	0
MACROD2-AS1	0	0	0	0	0	0	0	0
MAFG-AS1	2.39	1.51	2.32	1.23	2.46977	2.03205	2.9978	2.20271
MAGI2-AS3	9.13	9.15	7.89	8.03	7.30816	8.16928	7.59625	7.74194
MAPT-AS1	0	0	0	0	0	0	0	0
MCF2L-AS1	0	0	0	0	0.0157211	0.0564087	0.0179378	0.0211262
MCM3AP-AS1	0.3	0.19	0.26	0.19	0.112691	0.218743	0.129957	0.208497
MFI2-AS1	2.28	2.96	1.58	2.05	1.16881	1.88541	1.18144	2.30868
MIR100	0	0	0	0	0	0	0	0
MIR100HG	23.33	28.3	22.2	27.8	27.4793	30.4984	28.6048	30.7587
MIR101-1	0	0	0	0	0	0	0	0
MIR101-2	0	0	0	0	0	0	0	0
MIR103A1	0	0	0	0	0	0	0	0
MIR103A2	0	0	0	0	0	0	0	0
MIR103B1	0	0	0	0	0	0	0	0
MIR103B2	0	0	0	0	0	0	0	0
MIR105-1	0	0	0	0	0	0	0	0
MIR105-2	0	0	0	0	0	0	0	0
MIR106A	0	0	0	0	0	0	0	0
MIR106B	0	0	0	0	0	0	0	0
MIR107	0	0	0	0	0	0	0	0
MIR10A	0	0	0	0	0	0	0	0
MIR10B	0	0	0	0	0	0	0	0
MIR1-1	0	0	0	0	0	0	0	0
MIR1178	0	0	0	0	0	0	0	0
MIR1179	0	0	0	0	0	0	0	0
MIR1180	0	0	0	0	0	0	0	0
MIR1181	NA	NA	NA	NA	NA	NA	NA	NA
MIR1182	NA	NA	NA	NA	NA	NA	NA	NA
MIR1184-1	0	0	0	0	0	0	0	0
MIR1185-1	0	0	0	0	0	0	0	0
MIR1185-2	0	0	0	0	0	0	0	0
MIR1193	0	0	0	0	0	0	0	0
MIR1197	0	0	0	0	0	0	0	0
MIR1-2	0	0	0	0	0	0	0	0
MIR1200	0	0	0	0	0	0	0	0
MIR1203	0	0	0	0	0	0	0	0
MIR1204	1548.72	0	0	0	0	0	1958.64	0
MIR1205	0	0	0	0	0	0	0	0
MIR1206	0	0	0	0	0	0	0	0
MIR1207	0	0	0	0	0	0	0	0
MIR1208	0	0	0	0	0	0	0	0
MIR122	0	0	0	0	0	0	0	0
MIR1224	0	0	0	0	0	0	0	0
MIR1225	0	0	0	0	0	0	0	0
MIR1226	0	0	0	0	0	0	0	0
MIR1227	0	385.05	0	0	0	0	0	0
MIR1228	0	0	0	0	0	0	0	0
MIR1229	0	0	0	0	0	0	0	1540.39
MIR1231	0	0	0	0	0	0	0	0
MIR1233-2	0	0	0	0	0	0	0	0
MIR1234	0	0	0	0	0	0	0	0
MIR1236	0	0	0	0	0	0	0	0
MIR1237	0	165.56	0	0	0	0	0	0
MIR1238	0	0	0	0	0	0	0	0
MIR124-1	0	0	0	0	0	0	0	0
MIR124-2	0	0	0	0	0	0	0	0
MIR1243	0	0	0	0	0	0	0	0
MIR124-3	0	0	0	0	0	0	0	0
MIR1244-1	1276.4	202.11	0	0	0	0	2103.81	928.181
MIR1244-3	857.96	245.13	0	0	0	0	1399.01	185.354
MIR1245A	0	0	0	0	0	0	0	0
MIR1245B	0	0	0	0	0	0	0	0
MIR1246	0	0	0	0	0	0	0	0
MIR1247	0	0	0	0	0	0	0	0
MIR1248	0	0	0	0	0	1022.07	0	0
MIR1249	0	0	0	0	0	0	0	0
MIR1250	0	0	0	0	0	0	0	0
MIR1251	0	0	0	0	0	0	0	0
MIR1252	0	0	0	0	0	0	0	0
MIR1253	0	0	0	0	0	0	0	0
MIR1256	0	0	0	0	0	0	0	0
MIR1257	0	0	0	0	0	0	0	0
MIR1258	0	0	0	0	0	0	0	0
MIR125A	0	0	0	0	0	0	0	0
MIR125B1	0	0	0	0	0	0	0	0
MIR125B2	0	0	0	0	0	0	0	0
MIR126	0	0	0	0	0	0	0	0
MIR1260A	0	0	0	0	0	0	0	0
MIR1260B	0	0	0	0	0	0	0	0
MIR1262	0	0	0	0	0	0	0	0
MIR1264	0	0	0	0	0	0	0	0
MIR1265	0	0	0	0	0	0	0	0
MIR1266	0	0	0	0	0	0	0	0
MIR127	0	0	0	0	0	0	0	0
MIR1270-2	0	480.96	0	0	0	0	0	0
MIR1272	0	0	0	0	0	0	0	0
MIR1275	0	0	0	0	0	0	0	0
MIR1276	0	0	0	0	0	0	0	0
MIR1277	0	0	0	0	0	0	0	0
MIR1278	0	0	0	0	0	0	0	0
MIR1279	0	0	0	0	0	0	0	0
MIR1280	0	0	0	0	0	0	0	0
MIR1281	0	0	0	0	0	0	0	0
MIR128-1	0	0	0	0	0	0	0	0
MIR1282	0	0	0	0	0	0	0	0
MIR128-2	0	0	0	0	0	0	0	0
MIR1283-1	0	0	0	0	0	0	0	0
MIR1283-2	0	0	0	0	0	0	0	0
MIR1284	0	0	0	0	0	0	0	0
MIR1286	0	0	0	0	0	0	0	0
MIR1287	0	0	0	0	0	0	0	0
MIR1288	0	0	0	0	0	0	0	0
MIR1289-2	0	0	0	0	0	0	0	0
MIR1291	0	0	0	0	0	0	0	0
MIR129-1	0	0	0	0	0	0	0	0
MIR1292	1637.04	0	0	0	0	0	0	0
MIR129-2	0	0	0	0	0	0	0	0
MIR1293	0	0	0	0	0	0	0	0
MIR1295A	0	0	0	0	0	0	0	0
MIR1296	0	0	0	0	0	0	0	0
MIR1297	0	0	0	0	0	0	0	0
MIR1298	0	0	0	0	0	0	0	0
MIR1301	0	0	0	0	0	0	0	0
MIR1304	0	0	0	0	0	0	0	0
MIR1305	0	0	0	0	0	0	0	0
MIR1306	NA	NA	NA	NA	NA	NA	NA	NA
MIR1307	NA	NA	NA	NA	NA	NA	NA	NA
MIR130A	0	0	0	0	0	0	0	0
MIR130B	0	0	0	0	0	0	0	0
MIR132	0	0	0	0	0	0	0	0
MIR1322	0	0	0	0	0	0	0	0
MIR1323	0	0	0	0	0	0	0	0
MIR1324	0	0	0	0	0	0	0	0
MIR133A1	0	0	0	0	0	0	0	0
MIR133A2	0	0	0	0	0	0	0	0
MIR133B	0	0	0	0	0	0	0	0
MIR134	0	0	0	0	0	0	0	0
MIR1343	0	0	0	0	0	0	0	0
MIR135A1	0	0	0	0	0	0	0	0
MIR135A2	0	0	0	0	0	0	0	0
MIR135B	0	0	0	0	0	0	0	0
MIR136	0	0	0	0	0	0	0	0
MIR137	NA	NA	NA	NA	NA	NA	NA	NA
MIR137HG	0.69	0.32	0.74	0.39	0.379747	0.22668	0.422104	0.27406
MIR138-1	0	0	0	0	0	0	0	0
MIR138-2	0	0	0	0	0	0	0	0
MIR139	0	0	0	0	0	0	0	0
MIR140	0	0	0	0	0	0	0	0
MIR141	0	0	0	0	0	0	0	0
MIR142	0	0	0	0	0	0	0	0
MIR143	NA	NA	NA	NA	NA	NA	NA	NA
MIR143HG	2.19	3.83	2.12	3.72	1.56742	1.08291	1.55173	1.1474
MIR144	0	0	0	0	0	0	0	0
MIR145	NA	NA	NA	NA	NA	NA	NA	NA
MIR1468	0	0	0	0	0	0	0	0
MIR1469	0	0	0	0	0	0	0	0
MIR146A	0	0	0	0	0	0	0	0
MIR146B	0	0	0	0	0	0	0	0
MIR1470	0	0	0	0	0	0	0	0
MIR1471	0	0	0	0	0	0	0	0
MIR147A	0	0	0	0	0	0	0	0
MIR147B	NA	NA	NA	NA	NA	NA	NA	NA
MIR148A	0	0	0	0	0	0	0	0
MIR148B	0	0	0	0	0	0	0	0
MIR149	0	0	0	0	0	0	0	0
MIR150	0	0	0	0	0	0	0	0
MIR152	0	0	0	0	0	0	0	0
MIR153-1	0	0	0	0	0	0	0	0
MIR153-2	0	0	0	0	0	0	0	0
MIR1537	0	0	0	0	0	0	0	0
MIR1538	0	0	0	0	0	0	0	0
MIR1539	0	0	0	0	0	0	0	0
MIR154	0	0	0	0	0	0	0	0
MIR155	NA	NA	NA	NA	NA	NA	NA	NA
MIR155HG	2.32	4.07	2.62	4.24	2.53535	6.17673	2.41908	6.32288
MIR15A	0	0	0	0	0	0	0	0
MIR15B	0	0	0	0	0	0	0	0
MIR16-1	0	0	0	0	0	0	0	0
MIR16-2	0	0	0	0	0	0	0	0
MIR17	NA	NA	NA	NA	NA	NA	NA	NA
MIR17HG	0.61	0.55	0.5	0.67	0.335387	0.403279	0.508798	0.591462
MIR181A1	0	0	0	0	0	0	0	0
MIR181A2	0	0	0	0	0	0	0	0
MIR181A2HG	2.14	2.68	2	2.59	1.83009	2.10789	2.24478	2.39184
MIR181B1	0	0	0	0	0	0	0	0
MIR181B2	0	0	0	0	0	0	0	0
MIR181C	0	0	0	0	0	0	0	0
MIR181D	0	0	0	0	0	0	0	0
MIR182	0	0	0	0	0	0	0	0
MIR1827	0	0	0	0	0	0	0	0
MIR183	0	0	0	0	0	0	0	0
MIR184	0	0	0	0	0	0	0	0
MIR185	0	0	0	0	0	0	0	0
MIR186	0	0	0	0	0	0	0	0
MIR187	0	0	0	0	0	0	0	0
MIR188	0	0	0	0	0	0	0	0
MIR18A	NA	NA	NA	NA	NA	NA	NA	NA
MIR18B	0	0	0	0	0	0	0	0
MIR1908	0	0	0	0	0	0	0	0
MIR1909	0	0	0	0	0	0	0	744.323
MIR190A	0	0	0	0	0	0	0	0
MIR190B	0	0	0	0	0	0	0	0
MIR191	0	0	0	0	0	0	0	0
MIR1910	0	0	0	0	0	0	0	0
MIR1911	0	0	0	0	0	0	0	0
MIR1912	0	0	0	0	0	0	0	0
MIR1913	0	0	0	0	0	0	0	0
MIR1914	0	0	0	0	0	0	0	0
MIR1915	0	0	0	0	0	0	0	0
MIR192	0	0	0	0	0	0	0	0
MIR193A	0	0	0	0	0	0	0	0
MIR193B	0	0	0	0	0	0	0	0
MIR194-1	0	0	0	0	0	0	0	0
MIR194-2	0	0	0	0	0	0	0	0
MIR195	0	0	0	0	0	0	0	0
MIR196A1	0	0	0	0	0	0	0	0
MIR196A2	0	0	0	0	0	0	0	0
MIR196B	0	0	0	0	0	0	0	0
MIR197	0	0	0	0	0	0	0	0
MIR1972-1	0	0	0	0	0	0	0	859.356
MIR1973	0	0	0	0	0	0	0	0
MIR1976	0	0	0	0	0	0	0	0
MIR198	NA	NA	NA	NA	NA	NA	NA	NA
MIR199A1	0	0	0	0	0	0	0	0
MIR199A2	NA	NA	NA	NA	NA	NA	NA	NA
MIR199B	73.78	0	0	0	0	0	0	0
MIR19A	NA	NA	NA	NA	NA	NA	NA	NA
MIR19B1	NA	NA	NA	NA	NA	NA	NA	NA
MIR19B2	0	0	0	0	0	0	0	0
MIR200A	0	0	0	0	0	0	0	0
MIR200B	0	0	0	0	0	0	0	0
MIR200C	0	0	0	0	0	0	0	0
MIR202	0	0	0	0	0	0	0	0
MIR203	0	0	0	0	0	0	0	0
MIR204	0	0	0	0	0	0	0	0
MIR205	0	0	0	0	0	0	0	0
MIR2052	0	0	0	0	0	0	0	0
MIR2053	0	0	0	0	0	0	0	0
MIR2054	0	0	0	0	0	0	0	0
MIR205HG	0	0	0	0	0	0	0	0
MIR206	0	0	0	0	0	0	0	0
MIR208A	0	0	0	0	0	0	0	0
MIR208B	0	0	0	0	0	0	0	0
MIR20A	NA	NA	NA	NA	NA	NA	NA	NA
MIR20B	0	0	0	0	0	0	0	0
MIR21	0	0	0	0	0	0	0	0
MIR210	0	0	0	0	288.254	0	96.1346	117.439
MIR210HG	0.78	0.67	0.6	0.64	0.462568	0.321506	0.629827	0.342297
MIR211	0	0	0	0	0	0	0	0
MIR2110	NA	NA	NA	NA	NA	NA	NA	NA
MIR2113	0	0	0	0	0	0	0	0
MIR2114	0	0	0	0	0	0	0	0
MIR2116	0	0	0	0	0	0	0	0
MIR2117	0	0	0	0	0	0	0	0
MIR212	0	85.68	0	0	0	0	0	0
MIR214	NA	NA	NA	NA	NA	NA	NA	NA
MIR215	0	0	0	0	0	0	0	0
MIR216A	0	0	0	0	0	0	0	0
MIR216B	0	0	0	0	0	0	0	0
MIR217	0	0	0	0	0	0	0	0
MIR218-1	0	0	0	0	0	0	0	0
MIR218-2	0	0	0	0	0	0	0	0
MIR219-1	0	0	0	0	0	0	0	115.641
MIR219-2	0	0	0	0	0	0	0	0
MIR22	NA	NA	NA	NA	NA	NA	NA	NA
MIR221	77.22	0	0	0	0	0	0	119.304
MIR222	0	0	0	0	0	0	0	0
MIR223	0	0	0	0	0	0	0	0
MIR2276	0	0	0	0	0	0	0	0
MIR2277	NA	NA	NA	NA	NA	NA	NA	NA
MIR2278	0	0	0	0	0	0	0	0
MIR22HG	53.25	68.29	49.88	64.86	53.043	45.5643	53.2935	43.8053
MIR2355	0	0	0	0	0	0	0	0
MIR2392	0	0	0	0	0	0	0	0
MIR23A	0	0	0	0	0	0	0	0
MIR23B	0	0	0	0	0	0	0	0
MIR23C	0	0	0	0	0	0	0	0
MIR24-1	0	3738.16	0	0	0	0	0	0
MIR24-2	0	0	0	0	0	0	0	0
MIR2467	0	0	0	0	0	0	0	0
MIR25	0	0	0	0	0	0	0	557.183
MIR2681	0	0	0	0	0	0	0	0
MIR2682	0	0	0	0	0	0	0	122.83
MIR26A1	0	0	0	0	0	0	0	0
MIR26A2	0	0	0	0	0	0	0	0
MIR26B	0	0	0	0	0	0	0	0
MIR27A	0	0	0	0	0	0	0	0
MIR27B	0	0	0	0	0	0	0	317.033
MIR2861	0	0	0	0	0	0	382.929	424.248
MIR2909	0	0	0	0	0	0	0	0
MIR296	0	0	0	0	0	0	0	0
MIR2964A	0	0	0	0	0	0	0	0
MIR298	0	0	0	0	0	0	0	0
MIR299	0	0	0	0	0	0	0	0
MIR29A	0	0	0	0	0	0	0	0
MIR29B1	0	0	0	0	0	0	0	0
MIR29B2	0	0	0	0	0	0	0	0
MIR29C	0	0	0	0	0	0	0	0
MIR300	0	0	0	0	0	0	0	0
MIR301A	0	0	0	0	0	0	0	0
MIR301B	0	0	0	0	0	0	0	0
MIR302A	0	0	0	0	0	0	0	0
MIR302B	0	0	0	0	0	0	0	0
MIR302C	0	0	0	0	0	0	0	0
MIR302D	0	0	0	0	0	0	0	0
MIR302F	0	0	0	0	0	0	0	0
MIR3064	5368.85	7526.07	0	0	0	0	3284.59	4254.81
MIR3065	0	0	0	0	0	0	0	0
MIR3074	0	0	0	0	0	0	0	734.469
MIR30A	0	0	0	0	0	0	0	0
MIR30B	0	0	0	0	0	0	0	0
MIR30C1	0	0	0	0	0	0	0	0
MIR30C2	0	0	0	0	0	0	0	0
MIR30D	0	0	0	0	0	0	0	0
MIR30E	0	0	0	0	0	0	0	0
MIR31	0	0	0	0	0	0	0	0
MIR3115	0	0	0	0	0	0	0	0
MIR3117	0	0	0	0	0	0	0	0
MIR3119-2	0	0	0	0	0	0	0	0
MIR3120	0	0	0	0	0	0	0	0
MIR3121	0	0	0	0	0	0	0	0
MIR3122	0	0	0	0	0	0	0	0
MIR3123	0	0	0	0	0	0	0	0
MIR3124	0	0	0	0	0	0	0	0
MIR3125	0	0	0	0	0	0	0	0
MIR3126	0	0	0	0	0	0	0	0
MIR3127	0	0	0	0	0	0	0	0
MIR3128	0	0	0	0	0	0	0	0
MIR3129	0	0	0	0	0	0	0	0
MIR3130-1	0	0	0	0	0	0	0	0
MIR3131	0	0	0	0	0	0	0	0
MIR3132	0	0	0	0	0	0	0	0
MIR3134	0	0	0	0	0	0	0	0
MIR3136	0	0	0	0	0	0	0	0
MIR3138	0	0	0	0	0	0	0	0
MIR3140	0	0	0	0	0	0	0	0
MIR3141	0	0	0	0	0	0	0	0
MIR3142	0	0	0	0	0	0	0	0
MIR3143	0	0	0	0	0	0	0	0
MIR3145	0	0	0	0	0	0	0	0
MIR3146	0	0	0	0	0	0	0	0
MIR3147	0	0	0	0	0	0	0	0
MIR3148	0	0	0	0	0	0	0	0
MIR3150A	0	0	0	0	0	0	0	0
MIR3150B	0	0	0	0	0	0	0	0
MIR3151	0	0	0	0	0	0	0	0
MIR3152	0	0	0	0	0	0	0	0
MIR3153	0	0	0	0	0	0	0	0
MIR3154	0	0	0	0	0	0	0	0
MIR3155A	0	0	0	0	0	0	0	0
MIR3155B	0	0	0	0	0	0	0	0
MIR3156-1	0	0	0	0	0	0	0	0
MIR3156-2	0	0	0	0	0	0	0	0
MIR3156-3	0	0	0	0	0	0	0	0
MIR3157	0	0	0	0	0	0	0	0
MIR3158-1	0	0	0	0	0	0	0	0
MIR3160-1	0	0	0	0	0	0	0	0
MIR3160-2	0	0	0	0	0	0	0	0
MIR3162	0	0	0	0	0	0	0	0
MIR3165	0	0	0	0	0	0	0	0
MIR3167	0	0	0	0	0	0	0	0
MIR3169	0	0	0	0	0	0	0	0
MIR3170	0	0	0	0	0	0	0	0
MIR3173	0	0	0	0	0	0	0	0
MIR3175	0	0	0	0	0	0	0	0
MIR3176	0	0	0	0	0	0	0	0
MIR3177	0	0	0	0	0	NA	0	0
MIR3178	0	0	0	0	0	0	0	0
MIR3179-1	0	515.74	0	0	0	0	570.551	0
MIR3179-3	0	103.15	0	0	0	0	285.275	0
MIR3180-1	0.02	0	0	0	0	0	0	0
MIR3180-2	607.62	0	0	0	0	0	0	0
MIR3180-3	0.01	0	0	0	0	0	0	0
MIR3180-4	0	0	0	0	0	0	0	0
MIR3180-5	6.27	0.01	0	0	0	0	14.5038	0.0926482
MIR3182	0	0	0	0	0	0	0	0
MIR3183	0	0	0	0	0	0	0	0
MIR3184	0	0	0	0	0	0	0	0
MIR3185	0	0	0	0	0	0	0	0
MIR3186	0	0	0	0	0	0	0	0
MIR3187	0	0	0	0	0	0	0	0
MIR3188	0	0	0	0	0	0	0	0
MIR3189	0	0	0	0	0	0	0	1346
MIR3190	0	670.74	0	0	0	0	0	0
MIR3191	0	0	0	0	0	0	0	0
MIR3192	0	0	0	0	0	0	0	0
MIR3193	0	0	0	0	0	0	0	0
MIR3194	0	0	0	0	0	0	0	0
MIR3196	0	0	0	0	0	0	0	0
MIR3197	0	1047.08	0	0	0	0	0	0
MIR3198-1	0	0	0	0	0	0	0	0
MIR3198-2	NA	NA	NA	NA	NA	NA	NA	NA
MIR3199-1	0	0	0	0	0	0	0	0
MIR3199-2	0	0	0	0	0	0	0	0
MIR31HG	6.08	7.82	5.11	7.9	11.104	15.2883	11.9797	17.35
MIR32	0	0	0	0	0	0	0	0
MIR3200	0	0	0	0	0	0	0	0
MIR3201	0	0	0	0	0	0	0	0
MIR3202-1	0	0	0	0	0	0	0	0
MIR3202-2	0	0	0	0	0	0	0	0
MIR320A	0	0	0	0	0	0	0	0
MIR320B1	0	0	0	0	0	0	0	0
MIR320B2	0	0	0	0	0	0	0	0
MIR320C1	0	0	0	0	0	0	0	0
MIR320C2	0	0	0	0	0	0	0	0
MIR320D1	0	0	0	0	0	0	0	0
MIR320D2	0	0	0	0	0	0	0	0
MIR320E	0	0	0	0	0	0	0	0
MIR323A	0	0	0	0	0	0	0	0
MIR323B	0	0	0	0	0	0	0	0
MIR324	502.93	0	0	0	0	0	0	714.508
MIR326	0	0	0	0	0	0	0	0
MIR328	0	0	0	0	0	0	0	0
MIR329-1	0	0	0	0	0	0	0	0
MIR329-2	0	0	0	0	0	0	0	0
MIR330	0	0	0	0	0	0	0	0
MIR331	0	0	0	0	0	0	0	0
MIR335	0	0	0	0	0	0	0	0
MIR337	0	0	0	0	0	0	0	0
MIR338	0	0	0	0	0	0	0	0
MIR339	0	314	0	0	0	0	0	0
MIR33A	0	0	0	0	0	0	0	0
MIR33B	0	0	0	0	0	0	0	0
MIR340	0	0	0	0	0	0	0	0
MIR345	0	0	0	0	0	0	0	0
MIR346	0	0	0	0	0	0	0	0
MIR34A	0	0	0	333.33	0	0	0	0
MIR34B	0	0	0	0	0	0	0	0
MIR34C	0	0	0	0	0	0	0	0
MIR3529	0	0	0	0	0	0	0	0
MIR3545	0	0	0	0	0	0	0	0
MIR3591	0	0	0	0	0	0	0	0
MIR3605	0	0	0	0	0	0	0	0
MIR3606	0	0	0	0	0	0	0	0
MIR3607	0	0	0	0	0	0	0	0
MIR3609	0	0	0	0	0	0	0	0
MIR3610	NA	NA	NA	NA	NA	NA	NA	NA
MIR3612	0	0	0	0	0	0	0	0
MIR3613	0	0	0	0	0	0	0	0
MIR3614	NA	NA	NA	NA	NA	NA	NA	NA
MIR3615	0	0	0	0	0	0	0	0
MIR3616	0	0	0	0	0	0	0	0
MIR3618	NA	NA	NA	NA	NA	NA	NA	NA
MIR3619	0	0	0	0	0	0	0	0
MIR362	0	0	0	0	0	0	0	0
MIR3620	474.47	0	0	0	0	0	0	0
MIR3621	0	0	0	0	0	0	0	0
MIR3622A	0	0	0	0	0	0	0	0
MIR3622B	0	0	0	0	0	0	0	0
MIR363	0	0	0	0	0	0	0	0
MIR3646	0	0	0	0	0	0	0	0
MIR3648	26.84	37.99	26.73	38.68	24.5501	19.7127	21.0077	36.026
MIR3649	0	0	0	0	0	0	0	0
MIR3650	0	0	0	0	0	0	0	0
MIR3651	0	0	0	0	0	0	0	0
MIR3652	NA	NA	NA	NA	NA	NA	NA	NA
MIR3653	0	0	0	0	0	0	0	0
MIR3654	NA	NA	NA	NA	NA	NA	NA	NA
MIR3655	NA	NA	NA	NA	NA	NA	NA	NA
MIR3656	0	0	0	0	0	0	0	1654.66
MIR3658	NA	NA	NA	NA	NA	NA	NA	NA
MIR3659	0	0	0	0	0	0	0	0
MIR365A	0	0	0	0	0	0	0	0
MIR365B	0	0	0	0	0	0	0	0
MIR3660	0	0	0	0	0	0	0	0
MIR3661	0	0	0	0	0	0	0	0
MIR3662	0	0	0	0	0	0	0	0
MIR3663	0	0	0	0	0	0	0	0
MIR3664	0	0	0	0	0	0	0	0
MIR3665	0	0	0	0	0	0	0	0
MIR3666	0	0	0	0	0	0	0	0
MIR3668	0	0	0	0	0	0	0	0
MIR367	0	0	0	0	0	0	0	0
MIR3671	0	0	0	0	0	0	0	0
MIR3675	0	0	0	0	0	0	0	0
MIR3676	0	0	0	0	0	0	0	0
MIR3677	0	0	0	0	0	0	0	0
MIR3678	0	0	0	0	0	0	0	0
MIR3679	0	0	0	0	0	0	0	0
MIR3680-1	0	0	0	0	0	0	0	0
MIR3682	0	0	0	0	0	0	0	0
MIR3684	0	0	0	0	0	0	0	0
MIR3685	0	0	0	0	0	0	0	0
MIR3687	10001	13030.6	0	0	0	0	0	4569.56
MIR3688-1	0	0	0	0	0	0	0	0
MIR3688-2	0	0	0	0	0	0	0	0
MIR3689A	0	0	0	0	0	0	0	0
MIR3689B	0	0	0	0	0	0	0	0
MIR3689C	0	0	0	0	0	0	0	0
MIR3689D1	0	0	0	0	0	0	0	0
MIR3689D2	0	0	0	0	0	0	0	0
MIR3689E	0	0	0	0	0	0	0	0
MIR3689F	0	0	0	0	0	0	0	0
MIR369	0	0	0	0	0	0	0	0
MIR3690	0	0	0	0	0	0	0	0
MIR3691	0	0	0	0	0	0	0	0
MIR3692	0	0	0	0	0	0	0	0
MIR3714	NA	NA	NA	NA	NA	NA	NA	NA
MIR371A	0	0	0	0	0	0	0	0
MIR371B	0	0	0	0	0	0	0	0
MIR372	0	0	0	0	0	0	0	0
MIR373	0	0	0	0	0	0	0	0
MIR374A	0	0	0	0	0	0	0	0
MIR374B	0	0	0	0	0	0	0	0
MIR374C	0	0	0	0	0	0	0	0
MIR375	0	0	0	0	0	0	0	0
MIR376A1	0	0	0	0	0	0	0	0
MIR376A2	0	0	0	0	0	0	0	0
MIR376B	0	0	0	0	0	0	0	0
MIR376C	0	0	0	0	0	0	0	0
MIR377	0	0	0	0	0	0	0	0
MIR378C	0	0	0	0	0	0	0	0
MIR378D1	0	0	0	0	0	0	0	0
MIR378D2	0	0	0	0	0	0	0	0
MIR378E	0	0	0	0	0	0	0	0
MIR378F	0	0	0	0	0	0	0	0
MIR379	0	0	0	0	0	0	0	0
MIR380	0	0	0	0	0	0	0	0
MIR381	0	0	0	0	0	0	0	0
MIR382	0	0	0	0	0	0	0	0
MIR383	0	0	0	0	0	0	0	0
MIR384	0	0	0	0	0	0	0	0
MIR3907	0	0	0	0	0	0	0	0
MIR3908	0	0	0	0	0	0	0	0
MIR3909	0	0	0	0	0	0	0	0
MIR3910-1	0	0	0	0	0	0	0	0
MIR3910-2	0	0	0	0	0	0	0	0
MIR3911	0	96.55	0	0	0	0	0	0
MIR3912	0	0	0	0	0	0	0	0
MIR3913-1	0	0	0	0	0	0	0	0
MIR3913-2	0	0	0	0	0	0	0	0
MIR3914-1	0	0	0	0	0	0	0	0
MIR3914-2	0	0	0	0	0	0	0	0
MIR3916	384.29	0	0	0	0	0	251.276	0
MIR3917	0	0	0	0	0	0	0	0
MIR3918	0	0	0	0	0	0	0	0
MIR3919	0	0	0	0	0	0	0	0
MIR3920	0	0	0	0	0	0	0	0
MIR3921	0	0	0	0	0	0	0	0
MIR3922	0	0	0	0	0	0	0	0
MIR3924	0	0	0	0	0	0	0	0
MIR3925	0	0	0	0	0	0	0	0
MIR3926-1	0	0	0	0	0	0	0	0
MIR3926-2	0	0	0	0	0	0	0	0
MIR3928	0	0	0	0	0	0	0	0
MIR3935	0	0	0	0	0	0	0	0
MIR3936	0	0	0	0	0	0	0	0
MIR3938	0	0	0	0	0	0	0	0
MIR3939	0	0	0	0	0	0	0	0
MIR3940	0	0	0	0	0	0	0	0
MIR3941	0	0	0	0	0	0	0	0
MIR3942	0	0	0	0	0	0	0	0
MIR3943	0	0	0	0	0	0	0	0
MIR3944	0	0	356.74	0	0	0	0	0
MIR3945	0	0	0	0	0	0	0	0
MIR3960	307.49	400.75	0	0	0	0	1175.85	0
MIR3973	0	0	0	0	0	0	0	0
MIR3974	0	0	0	0	0	0	0	0
MIR3975	0	0	0	0	0	0	0	0
MIR3976	0	0	0	0	0	0	0	0
MIR3977	0	0	0	0	0	0	0	0
MIR3978	0	0	0	0	0	0	0	0
MIR409	0	0	0	0	0	0	0	0
MIR410	0	0	0	0	0	0	0	0
MIR411	0	0	0	0	0	0	0	0
MIR412	0	0	0	0	0	0	0	0
MIR421	0	0	0	0	0	0	0	0
MIR423	0	0	0	0	0	0	0	0
MIR424	0	0	0	0	0	0	0	0
MIR425	0	0	0	0	0	0	0	0
MIR4251	0	0	0	0	0	0	0	0
MIR4252	0	0	0	0	0	0	0	0
MIR4253	0	0	0	0	0	0	0	0
MIR4254	0	0	0	0	0	0	0	0
MIR4255	0	0	0	0	0	0	0	0
MIR4256	0	0	0	0	0	0	0	0
MIR4257	0	592.64	0	0	0	0	0	0
MIR4258	0	0	0	0	0	0	0	0
MIR4260	0	0	0	0	0	0	0	0
MIR4261	0	0	0	0	0	0	0	0
MIR4262	0	0	0	0	0	0	0	0
MIR4263	0	0	0	0	0	0	0	0
MIR4264	0	0	0	0	0	0	0	0
MIR4265	0	0	0	0	0	0	0	0
MIR4266	0	0	0	0	0	0	0	0
MIR4267	0	0	0	0	0	0	0	0
MIR4268	0	0	0	0	0	0	0	0
MIR4269	0	0	0	0	0	0	0	0
MIR4270	0	0	0	0	0	0	0	0
MIR4271	0	0	0	0	0	0	0	0
MIR4272	0	0	0	0	0	0	0	0
MIR4273	0	0	0	0	0	0	0	0
MIR4274	0	0	0	0	0	0	0	0
MIR4275	0	0	0	0	0	0	0	0
MIR4276	0	0	0	0	0	0	0	0
MIR4277	0	0	0	0	0	0	0	0
MIR4278	0	0	0	0	0	0	0	0
MIR4279	0	0	0	0	0	0	0	0
MIR4280	0	0	0	0	0	0	0	0
MIR4281	0	0	0	0	0	0	0	0
MIR4282	0	0	0	0	0	0	0	0
MIR4283-1	0	0	0	0	0	0	0	0
MIR4283-2	0	0	0	0	0	0	0	0
MIR4284	0	0	0	0	0	0	0	0
MIR4285	0	0	0	0	0	0	0	0
MIR4287	0	0	0	0	0	0	0	0
MIR4288	0	0	0	0	0	0	0	0
MIR4289	0	0	0	0	0	0	0	0
MIR429	0	0	0	0	0	0	0	0
MIR4290	0	0	0	0	0	0	0	0
MIR4291	0	0	0	0	0	0	0	0
MIR4292	0	0	0	0	0	0	0	0
MIR4294	0	0	0	0	0	0	0	0
MIR4295	0	0	0	0	0	0	0	0
MIR4296	0	0	0	0	0	0	0	0
MIR4297	0	0	0	0	0	0	0	0
MIR4298	0	0	0	0	0	0	0	0
MIR4299	0	0	0	0	0	0	0	0
MIR4300	0	0	0	0	0	0	0	0
MIR4301	0	0	0	0	0	0	0	0
MIR4302	0	0	0	0	0	0	0	0
MIR4303	0	0	0	0	0	0	0	0
MIR4304	0	0	0	0	0	0	0	0
MIR4305	0	0	0	0	0	0	0	0
MIR4306	0	0	0	0	0	0	0	0
MIR4307	0	0	0	0	0	0	0	0
MIR4308	0	0	0	0	0	0	0	0
MIR4309	0	0	0	0	0	0	0	0
MIR431	0	0	0	0	0	0	0	0
MIR4310	0	0	0	0	0	0	0	0
MIR4311	0	0	0	0	0	0	0	0
MIR4312	0	0	0	0	0	0	0	0
MIR4313	0	0	0	0	0	0	0	0
MIR4314	0	0	0	0	0	0	0	0
MIR4315-2	0	0	0	0	0	0	16.2415	23.593
MIR4316	0	0	0	0	0	0	0	0
MIR4317	0	0	0	0	0	0	0	0
MIR4318	0	0	0	0	0	0	0	0
MIR4319	0	0	0	0	0	0	0	0
MIR432	0	0	0	0	0	0	0	0
MIR4320	0	0	0	0	0	0	0	0
MIR4321	0	0	0	0	0	0	0	0
MIR4322	0	0	0	0	0	0	0	0
MIR4323	0	0	0	0	0	0	0	0
MIR4324	0	0	0	0	0	0	0	0
MIR4325	0	0	0	0	0	0	0	0
MIR4326	0	0	0	0	0	0	0	0
MIR4327	0	0	0	0	0	0	0	0
MIR4328	0	0	0	0	0	0	0	0
MIR4329	0	0	0	0	0	0	0	0
MIR433	0	0	0	0	0	0	0	0
MIR4330	0	0	0	0	0	0	0	0
MIR4417	0	0	0	0	0	0	0	0
MIR4420	0	0	0	0	0	0	0	0
MIR4422	0	0	0	0	0	0	0	0
MIR4423	0	0	0	0	0	0	0	0
MIR4424	0	0	0	0	0	0	0	0
MIR4426	NA	NA	NA	NA	NA	NA	NA	NA
MIR4427	0	0	0	0	0	0	0	0
MIR4429	0	0	0	0	0	0	0	0
MIR4432	0	0	0	0	0	0	0	0
MIR4434	0	0	0	0	0	0	0	0
MIR4435-1	0	0	0	0	0	0	0	0
MIR4435-2	0	0	0	0	0	0	0	0
MIR4436A	0	0	0	0	0	0	0	0
MIR4436B1	0	0	0	0	0	0	0	0
MIR4437	0	0	0	0	0	0	0	0
MIR4439	0	0	0	0	0	0	0	0
MIR4440	0	0	0	0	0	0	0	0
MIR4441	0	0	0	0	0	0	0	0
MIR4442	0	0	0	0	0	0	0	4851.01
MIR4443	0	0	0	0	0	0	0	0
MIR4444-1	0	0.08	0	0	0	0	0	0
MIR4446	0	0	0	0	0	0	0	0
MIR4449	0	0	0	0	0	0	0	0
MIR4450	0	0	0	0	0	0	0	0
MIR4451	0	0	0	0	0	0	0	0
MIR4453	NA	NA	NA	NA	NA	NA	NA	NA
MIR4454	0	0	0	0	0	0	0	0
MIR4456	0	0	0	0	0	0	0	0
MIR4457	0	0	0	0	0	0	0	0
MIR4458	NA	NA	NA	NA	NA	NA	NA	NA
MIR4460	0	0	0	0	0	0	0	0
MIR4461	0	0	0	0	0	0	0	0
MIR4462	0	0	0	0	0	0	0	0
MIR4464	0	0	0	0	0	0	0	0
MIR4465	0	0	0	0	0	0	0	0
MIR4466	0	0	0	0	0	0	0	0
MIR4467	0	0	0	0	0	0	0	0
MIR4468	0	0	0	0	0	0	0	0
MIR4469	0	NA	0	0	0	0	0	0
MIR4470	0	0	0	0	0	0	0	0
MIR4471	0	0	0	0	0	0	0	0
MIR4472-1	0	0	0	0	0	0	0	0
MIR4472-2	0	0	0	0	0	0	0	0
MIR4473	0	0	0	0	0	0	0	0
MIR4474	0	0	0	0	0	0	0	0
MIR4475	0	0	0	0	0	0	0	0
MIR4476	0	0	0	0	0	0	0	0
MIR4478	0	0	0	0	0	0	0	0
MIR4479	0	0	0	0	0	0	0	0
MIR448	0	0	0	0	0	0	0	0
MIR4480	0	0	0	0	0	0	0	0
MIR4482-1	0	0	0	0	0	0	1604.22	0
MIR4483	0	0	0	0	0	0	0	0
MIR4484	0	0	0	0	0	0	0	0
MIR4485	NA	NA	NA	NA	NA	NA	NA	NA
MIR4486	0	0	0	0	0	0	0	0
MIR4488	0	0	0	0	0	0	0	0
MIR4489	0	0	0	0	0	0	0	0
MIR4490	0	0	0	0	0	0	0	0
MIR4491	0	0	0	0	0	0	0	0
MIR4492	0	0	0	0	0	0	0	0
MIR4493	0	0	0	0	0	0	0	0
MIR4497	0	0	0	0	0	0	387.733	0
MIR4498	0	0	0	0	0	0	0	0
MIR4499	0	0	0	0	0	0	0	0
MIR449A	0	0	0	0	0	0	0	0
MIR449B	0	0	0	0	0	0	0	0
MIR449C	0	0	0	0	0	0	0	0
MIR4500	0	0	0	0	0	0	0	0
MIR4500HG	0.01	0	0	0	0.0120872	0.0307399	0	0.0846443
MIR4503	0	0	0	0	0	0	0	0
MIR4505	0	0	0	0	0	0	0	0
MIR4508	0	0	0	0	0	0	0	0
MIR4509-1	0	0	0	0	0	0	0	0
MIR4509-2	0	0	0	0	0	0	0	0
MIR450A1	0	0	0	0	0	0	0	0
MIR450A2	0	0	0	0	0	0	0	0
MIR450B	0	0	0	0	0	0	0	0
MIR4510	0	0	0	0	0	0	0	0
MIR4511	0	0	0	0	0	0	0	0
MIR4513	0	0	0	0	0	0	0	0
MIR4514	0	0	0	0	0	0	0	0
MIR4515	0	0	0	0	0	0	0	0
MIR4516	0	0	0	0	0	0	0	0
MIR4517	0	606.81	0	0	0	0	0	0
MIR4518	0	0	0	0	0	0	0	0
MIR4519	0	0	0	0	0	0	0	0
MIR451A	0	0	0	0	0	0	0	0
MIR451B	0	0	0	0	0	0	0	0
MIR452	0	0	0	0	0	0	0	0
MIR4520A	0	0	0	0	0	0	0	0
MIR4520B	0	0	0	0	0	0	0	0
MIR4521	0	0	0	0	0	0	0	0
MIR4522	0	0	0	0	0	0	0	0
MIR4523	1028.4	2704.92	0	0	0	0	0	0
MIR4524A	0	0	0	0	0	0	0	0
MIR4526	0	0	0	0	0	0	0	0
MIR4529	0	0	0	0	0	0	0	0
MIR4530	0	0	0	0	0	0	0	0
MIR4531	0	0	0	0	0	0	0	0
MIR4532	0	0	0	0	0	0	0	0
MIR4533	0	0	0	0	0	0	0	0
MIR4534	0	0	0	0	0	0	0	0
MIR4535	0	0	0	0	0	0	0	0
MIR4536-1	0	0	0	0	0	0	0	0
MIR454	0	0	0	0	0	0	0	0
MIR4540	0	0	0	0	0	0	0	0
MIR455	0	0	0	0	0	0	0	0
MIR4632	0	0	0	0	0	0	0	0
MIR4633	0	0	0	0	0	0	0	0
MIR4634	0	0	0	0	0	0	0	0
MIR4635	0	0	0	0	0	0	0	0
MIR4636	0	0	0	0	0	0	0	0
MIR4637	0	0	0	0	0	0	0	0
MIR4638	0	0	0	0	0	0	0	0
MIR4639	0	0	0	0	0	0	0	0
MIR4640	0	0	0	0	0	0	0	0
MIR4641	0	0	0	0	0	0	0	0
MIR4642	0	0	0	0	0	0	0	0
MIR4643	0	0	0	0	0	0	0	0
MIR4644	0	0	0	0	0	0	0	0
MIR4645	0	0	0	0	0	0	0	0
MIR4646	0	0	0	0	0	0	0	0
MIR4647	NA	NA	NA	NA	NA	NA	NA	NA
MIR4648	0	0	0	0	0	0	0	0
MIR4649	0	569.29	0	0	0	0	582.224	0
MIR4650-2	0	0	0	0	0	0	0	0
MIR4651	0	0	0	0	0	0	0	0
MIR4652	0	0	0	0	0	0	0	0
MIR4653	0	0	0	0	0	0	598.082	0
MIR4654	0	0	0	0	0	0	0	0
MIR4655	0	0	0	0	0	0	0	0
MIR4656	0	0	0	0	0	0	932.122	0
MIR4657	NA	NA	NA	NA	NA	NA	NA	NA
MIR4658	0	0	0	0	0	0	0	0
MIR4659A	0	0	0	0	0	0	0	0
MIR4659B	0	0	0	0	0	0	0	0
MIR4660	0	0	0	0	0	0	0	0
MIR4661	0	0	0	0	0	0	0	0
MIR4663	0	0	0	0	0	0	0	0
MIR4664	0	0	0	0	0	0	0	0
MIR4665	0	0	0	0	0	0	0	0
MIR4666A	0	0	0	0	0	0	0	0
MIR4667	0	0	0	0	0	0	0	0
MIR4668	0	0	0	0	0	0	0	0
MIR4669	0	0	0	0	0	0	0	0
MIR4670	0	0	0	0	0	0	0	0
MIR4671	0	0	0	0	0	0	0	0
MIR4672	0	0	0	0	0	0	0	0
MIR4673	0	0	0	0	0	0	0	0
MIR4674	0	470.77	0	0	0	0	0	0
MIR4675	0	0	0	0	0	0	0	0
MIR4676	0	0	0	0	0	0	0	0
MIR4677	0	0	0	0	0	0	0	0
MIR4678	0	0	0	0	0	0	0	0
MIR4679-1	0	0	0	0	0	0	0	0
MIR4679-2	0	0	0	0	0	0	0	0
MIR4680	NA	NA	NA	NA	NA	NA	NA	NA
MIR4681	0	0	0	0	0	0	0	0
MIR4682	0	0	0	0	0	0	0	0
MIR4683	NA	NA	NA	NA	NA	NA	NA	NA
MIR4684	0	0	0	0	0	0	0	0
MIR4685	0	0	0	0	0	0	0	0
MIR4686	0	0	0	0	0	0	0	0
MIR4687	NA	NA	NA	NA	NA	NA	NA	NA
MIR4688	0	0	0	0	0	0	0	645.936
MIR4689	0	0	0	0	0	0	0	0
MIR4690	0	0	0	0	0	0	0	0
MIR4691	354.11	0	0	0	0	0	0	0
MIR4692	0	0	0	0	0	0	0	0
MIR4693	0	0	0	0	0	0	0	0
MIR4694	0	0	0	0	0	0	0	0
MIR4695	0	0	0	0	0	0	0	0
MIR4696	0	0	0	0	0	0	0	0
MIR4697	NA	NA	NA	NA	NA	NA	NA	NA
MIR4698	0	0	0	0	0	0	0	0
MIR4699	0	0	0	0	0	0	0	0
MIR4700	NA	NA	NA	NA	NA	NA	NA	NA
MIR4701	0	668.72	0	0	0	0	0	0
MIR4703	0	0	0	0	0	0	0	0
MIR4705	0	0	0	0	0	0	0	0
MIR4706	0	0	0	0	0	0	0	0
MIR4707	NA	NA	NA	NA	NA	NA	NA	NA
MIR4708	0	0	0	0	0	0	0	0
MIR4709	NA	NA	NA	NA	NA	NA	NA	NA
MIR4710	0	0	0	0	0	0	0	0
MIR4711	0	0	0	0	0	0	0	0
MIR4712	0	0	0	0	0	0	0	0
MIR4713	0	0	0	0	0	0	0	0
MIR4714	0	0	0	0	0	0	0	0
MIR4715	0	0	0	0	0	0	0	0
MIR4716	0	0	0	0	0	0	0	0
MIR4717	0	0	0	0	0	0	0	0
MIR4718	0	0	0	0	0	0	0	0
MIR4719	0	0	0	0	0	0	0	0
MIR4720	0	0	0	0	0	0	0	0
MIR4721	0	0	0	0	0	0	0	0
MIR4722	0	0	0	0	0	0	0	0
MIR4723	0	0	0	0	0	0	0	0
MIR4724	NA	NA	NA	NA	NA	NA	NA	NA
MIR4725	0	0	0	0	0	0	0	0
MIR4726	0	0	0	0	0	0	0	0
MIR4727	0	0	0	0	0	0	0	0
MIR4728	0	0	0	0	0	0	0	0
MIR4729	0	0	0	0	0	0	0	0
MIR4730	0	0	0	0	0	0	0	0
MIR4731	0	0	0	0	0	0	0	0
MIR4732	0	0	0	0	0	0	0	0
MIR4733	0	0	0	0	0	0	0	0
MIR4734	0	0	0	0	0	0	0	0
MIR4735	0	0	0	0	0	0	0	0
MIR4736	0	0	0	0	0	0	0	0
MIR4737	403.63	528.04	0	0	0	0	0	0
MIR4738	0	0	0	0	0	0	0	0
MIR4739	0	0	0	0	0	0	0	0
MIR4740	0	0	0	0	0	0	0	0
MIR4741	NA	NA	NA	NA	NA	NA	NA	NA
MIR4742	0	0	0	0	0	0	0	0
MIR4743	0	0	0	0	0	0	0	0
MIR4744	0	0	0	0	0	0	0	0
MIR4745	0	328.72	0	0	0	0	0	0
MIR4746	0	0	0	0	0	0	0	0
MIR4747	0	0	0	0	0	0	0	0
MIR4748	0	0	0	0	0	0	0	0
MIR4749	0	0	0	0	0	0	0	0
MIR4750	0	0	0	0	0	0	0	0
MIR4751	NA	NA	NA	NA	NA	NA	NA	NA
MIR4752	0	0	0	0	0	0	0	0
MIR4753	0	0	0	0	0	0	0	0
MIR4754	278.12	361.82	0	0	0	0	769.287	0
MIR4755	0	0	0	0	0	0	0	0
MIR4756	0	0	0	0	0	0	0	0
MIR4757	0	0	0	0	0	0	0	0
MIR4758	0	0	0	0	0	0	0	0
MIR4759	0	0	0	0	0	0	0	0
MIR4760	0	0	0	0	0	0	0	0
MIR4761	0	0	0	0	0	0	0	0
MIR4762	0	0	0	0	0	0	0	0
MIR4763	NA	NA	NA	NA	NA	NA	NA	NA
MIR4764	0	0	0	0	0	0	0	0
MIR4765	0	0	0	0	0	0	0	0
MIR4766	0	0	0	0	0	0	0	0
MIR4767	1148.21	0	0	0	0	0	0	798.856
MIR4768	0	0	0	0	0	0	0	0
MIR4769	0	0	0	0	0	0	0	0
MIR4770	0	0	0	0	0	0	0	0
MIR4772	0	0	0	0	0	0	0	0
MIR4773-1	0	0	0	0	0	0	0	0
MIR4774	0	0	0	0	0	0	0	0
MIR4775	NA	NA	NA	NA	NA	NA	NA	NA
MIR4776-2	0	0	0	0	0	0	0	0
MIR4777	0	0	0	0	0	0	0	0
MIR4778	0	0	0	0	0	0	0	0
MIR4779	0	0	0	0	0	0	0	0
MIR4780	0	0	0	0	0	0	0	0
MIR4781	0	0	0	0	0	0	0	0
MIR4782	0	0	0	0	0	0	0	0
MIR4783	0	0	0	0	0	0	0	0
MIR4784	515.26	2014.41	0	0	0	0	661.788	719.508
MIR4785	0	952.64	0	0	0	0	1910.91	981.368
MIR4786	0	0	0	0	0	0	0	0
MIR4787	0	0	0	0	0	0	0	528.381
MIR4788	0	0	0	0	0	0	0	0
MIR4789	0	0	0	0	0	0	0	0
MIR4790	0	0	0	0	0	0	0	0
MIR4791	0	0	0	0	0	0	0	0
MIR4792	0	0	0	0	0	0	0	0
MIR4793	0	0	0	0	0	0	0	0
MIR4794	0	0	0	0	0	0	0	0
MIR4795	0	0	0	0	0	0	0	0
MIR4796	0	0	0	0	0	0	0	0
MIR4797	0	0	0	0	0	0	0	0
MIR4798	0	0	0	0	0	0	0	0
MIR4799	0	0	0	0	0	0	0	0
MIR4800	NA	NA	NA	NA	NA	NA	NA	NA
MIR4801	0	0	0	0	0	0	0	0
MIR4802	0	0	0	0	0	0	0	0
MIR4803	0	0	0	0	0	0	0	0
MIR4804	0	0	0	0	0	0	0	0
MIR483	0	0	0	0	0	0	0	0
MIR484	NA	NA	NA	NA	NA	NA	NA	NA
MIR485	0	0	0	0	0	0	0	0
MIR486	0	0	0	0	0	0	0	0
MIR487A	0	0	0	0	0	0	0	0
MIR487B	0	0	0	0	0	0	0	0
MIR488	0	0	0	0	0	0	0	0
MIR489	0	0	0	0	0	0	0	0
MIR490	0	0	0	0	0	0	0	0
MIR491	0	0	0	0	0	0	0	0
MIR492	172.63	57.54	0	0	0	0	320.154	203.349
MIR493	0	0	0	0	0	0	0	0
MIR494	0	0	0	0	0	0	0	0
MIR495	0	0	0	0	0	0	0	0
MIR496	0	0	0	0	0	0	0	0
MIR497	0	0	0	0	0	0	0	0
MIR497HG	0.23	0.18	0.1	0.19	0.12532	0.0311126	0	0.175409
MIR498	0	0	0	0	0	0	0	0
MIR499A	0	0	0	0	0	0	0	0
MIR499B	0	0	0	0	0	0	0	0
MIR500A	0	0	0	0	0	0	0	0
MIR500B	0	0	0	0	0	0	0	0
MIR501	0	0	0	0	0	0	0	0
MIR502	0	0	0	0	0	0	0	0
MIR503	0	0	0	0	0	0	0	0
MIR504	0	0	0	0	0	0	0	0
MIR5047	2269.56	1760.42	27325.7	37839.4	0	0	1337.27	258.151
MIR505	0	0	0	0	0	0	0	0
MIR506	0	0	0	0	0	0	0	0
MIR507	0	0	0	0	0	0	0	0
MIR508	0	0	0	0	0	0	0	0
MIR509-1	0	0	0	0	0	0	0	0
MIR509-2	NA	NA	NA	NA	NA	NA	NA	NA
MIR509-3	0	0	0	0	0	0	0	0
MIR5095	0	0	0	0	0	0	0	0
MIR510	0	0	0	0	0	0	0	0
MIR511-1	0	0	0	0	0	0	0	0
MIR512-1	0	0	0	0	0	0	0	0
MIR512-2	0	0	0	0	0	0	0	0
MIR514A1	0	0	0	0	0	0	0	0
MIR514A3	0	0	0	0	0	0	0	0
MIR514B	0	0	0	0	0	0	0	0
MIR515-1	0	0	0	0	0	0	0	0
MIR516A1	0	0	0	0	0	0	0	0
MIR516A2	0	0	0	0	0	0	0	0
MIR516B1	0	0	0	0	0	0	0	0
MIR516B2	0	0	0	0	0	0	0	0
MIR517A	0	0	0	0	0	0	0	0
MIR517B	0	0	0	0	0	0	0	0
MIR517C	0	0	0	0	0	0	0	0
MIR518A1	0	0	0	0	0	0	0	0
MIR518A2	0	0	0	0	0	0	0	0
MIR518B	0	0	0	0	0	0	0	0
MIR518C	0	0	0	0	0	0	0	0
MIR518D	0	0	0	0	0	0	0	0
MIR518E	0	0	0	0	0	0	0	0
MIR518F	0	0	0	0	0	0	0	0
MIR519A1	0	0	0	0	0	0	0	0
MIR519A2	0	0	0	0	0	0	0	0
MIR519B	0	0	0	0	0	0	0	0
MIR519C	0	0	0	0	0	0	0	0
MIR519D	0	0	0	0	0	0	0	0
MIR519E	0	0	0	0	0	0	0	0
MIR520A	0	0	0	0	0	0	0	0
MIR520B	0	0	0	0	0	0	0	0
MIR520C	0	0	0	0	0	0	0	0
MIR520D	0	0	0	0	0	0	0	0
MIR520E	0	0	0	0	0	0	0	0
MIR520F	0	0	0	0	0	0	0	0
MIR520G	0	0	0	0	0	0	0	0
MIR520H	0	0	0	0	0	0	0	0
MIR521-1	0	0	0	0	0	0	0	0
MIR521-2	0	0	0	0	0	0	0	0
MIR522	0	0	0	0	0	0	0	0
MIR523	0	0	0	0	0	0	0	0
MIR524	0	0	0	0	0	0	0	0
MIR525	0	0	0	0	0	0	0	0
MIR526A1	0	0	0	0	0	0	0	0
MIR526A2	0	0	0	0	0	0	0	0
MIR526B	0	0	0	0	0	0	0	0
MIR527	0	0	0	0	0	0	0	0
MIR532	0	0	0	0	0	0	0	0
MIR539	0	0	0	0	0	0	0	0
MIR541	0	0	0	0	0	0	0	0
MIR542	0	0	0	0	0	0	0	0
MIR543	0	0	0	0	0	0	0	0
MIR545	0	0	0	0	0	0	0	0
MIR548A1	0	0	0	0	0	0	0	0
MIR548A2	0	0	0	0	0	0	0	0
MIR548A3	0	0	0	0	0	0	0	0
MIR548AA2	0	0	0	0	0	0	0	0
MIR548AC	0	0	0	0	0	0	0	0
MIR548AD	0	0	0	0	0	0	0	0
MIR548AE2	0	0	0	0	0	0	0	0
MIR548AI	0	0	0	0	0	0	0	0
MIR548AJ2	0	0	0	0	0	0	0	0
MIR548AL	0	0	0	0	0	0	0	0
MIR548AN	0	0	0	0	0	0	0	0
MIR548B	0	0	0	0	0	0	0	0
MIR548D1	0	0	0	0	0	0	0	0
MIR548D2	0	0	0	0	0	0	0	0
MIR548F1	0	0	0	0	0	0	0	0
MIR548F2	0	0	0	0	0	0	0	0
MIR548F3	0	0	0	0	0	0	0	0
MIR548F4	0	0	0	0	0	0	0	0
MIR548F5	0	0	0	0	0	0	0	0
MIR548G	0	0	0	0	0	0	0	0
MIR548H2	0	0	0	0	0	0	0	0
MIR548H3	0	0	0	0	0	0	0	0
MIR548H4	0	0	0	0	0	0	0	0
MIR548I1	0	0	0	0	0	0	0	0
MIR548I2	0	0	0	0	0	0	0	0
MIR548I3	0	0	0	0	0	0	0	0
MIR548I4	0	0	0	0	0	0	0	0
MIR548J	0	0	0	0	0	0	0	0
MIR548K	0	0	0	0	0	0	0	0
MIR548M	0	0	0	0	0	0	0	0
MIR548N	0	0	0	0	0	0	0	0
MIR548O2	0	0	0	0	0	0	0	0
MIR548Q	0	0	0	0	0	0	0	0
MIR548T	0	0	0	0	0	0	0	0
MIR548W	0	0	0	0	0	0	0	0
MIR548X	0	0	0	0	0	0	0	0
MIR548Y	0	0	0	0	0	0	0	0
MIR548Z	0	0	0	0	0	0	0	0
MIR549	0	0	0	0	0	0	0	0
MIR550A1	0	0	0	0	0	0	0	0
MIR550A2	0	0	0	0	0	0	0	0
MIR550A3	0	0	0	0	0	0	0	0
MIR551A	0	0	0	0	0	0	0	0
MIR551B	0	0	0	0	0	0	0	0
MIR553	0	0	0	0	0	0	0	0
MIR554	0	0	0	0	0	0	0	0
MIR555	0	0	0	0	0	0	0	0
MIR556	0	0	0	0	0	0	0	0
MIR557	0	0	0	0	0	0	0	0
MIR558	0	0	0	0	0	0	0	0
MIR559	0	0	0	0	0	0	0	0
MIR561	0	0	0	0	0	0	0	0
MIR563	0	0	0	0	0	0	0	0
MIR564	213.71	278.79	0	0	0	0	1703.27	306.547
MIR567	0	0	0	0	0	0	0	0
MIR568	0	0	0	0	0	0	0	0
MIR569	0	0	0	0	0	0	0	0
MIR570	0	0	0	0	0	0	0	621.24
MIR572	0.01	0.02	0	0	0	0	0	0
MIR573	0	0	0	0	0	0	0	0
MIR574	0	0	0	0	0	0	0	305.299
MIR575	0	0	0	0	0	0	0	0
MIR577	0	0	0	0	0	0	0	0
MIR578	0	0	0	0	0	0	0	0
MIR580	0	0	0	0	0	0	0	0
MIR581	0	0	0	0	0	0	0	0
MIR583	0	0	0	0	0	0	0	0
MIR585	0	0	0	0	0	0	0	0
MIR586	0	0	0	0	0	0	0	0
MIR589	0	0	0	0	0	0	0	0
MIR590	0	0	0	0	0	0	0	0
MIR591	0	0	0	0	0	0	0	0
MIR592	0	0	0	0	0	0	0	0
MIR593	0	0	0	0	0	0	0	0
MIR595	0	0	0	0	0	0	0	0
MIR596	0	0	0	0	0	0	0	0
MIR597	0	0	0	0	0	0	0	0
MIR598	0	0	0	0	0	0	0	0
MIR599	0	0	0	0	0	0	0	0
MIR600	NA	NA	NA	NA	NA	NA	NA	NA
MIR600HG	0.15	0.14	0.09	0.13	0.10045	0.12648	0.105068	0.130125
MIR601	0	0	0	0	0	0	0	0
MIR602	0	0	0	0	0	0	0	0
MIR603	0	0	0	0	0	0	0	0
MIR604	0	0	0	0	0	0	0	0
MIR605	0	0	0	0	0	0	0	0
MIR608	0	0	0	0	0	0	0	0
MIR609	0	0	0	0	0	0	0	0
MIR610	0	0	0	0	0	0	0	0
MIR611	1539.5	0	0	0	0	0	0	0
MIR612	0	0	0	0	0	0	210.116	243.886
MIR613	0	0	0	0	0	0	0	0
MIR614	0	0	0	0	0	0	0	0
MIR615	0	0	0	0	0	0	0	0
MIR617	0	0	0	0	0	0	0	0
MIR618	0	0	0	0	0	0	0	0
MIR620	0	0	0	0	0	0	0	0
MIR621	NA	NA	NA	NA	NA	NA	NA	NA
MIR622	557.78	474.68	0	0	0	0	0.0487468	273.109
MIR623	0	0	0	0	0	0	0	0
MIR624	0	0	0	0	0	0	0	0
MIR626	0	0	0	0	0	0	0	0
MIR627	0	0	0	0	0	0	0	0
MIR628	0	0	0	0	0	0	0	0
MIR629	0	0	0	0	0	0	0	0
MIR630	0	0	0	0	0	0	0	0
MIR631	0	0	0	0	0	0	0	0
MIR632	0	0	0	0	0	0	0	0
MIR634	0	0	0	0	0	0	0	0
MIR635	0	399.57	0	0	0	0	199.981	462.72
MIR636	0	0	0	0	0	0	0	0
MIR637	332.13	211.46	0	0	0	0	0	480.71
MIR638	0	0	0	0	0	0	0	0
MIR639	0	0	0	0	0	0	0	0
MIR641	0	0	0	0	0	0	369.245	0
MIR642A	0	0	0	0	0	0	0	0
MIR642B	0	0	0	0	0	0	0	0
MIR643	0	0	0	0	0	0	0	0
MIR644A	0	0	0	0	0	0	0	0
MIR645	0	0	0	0	0	0	0	0
MIR647	0	0	0	0	0	0	0	0
MIR648	0	0	0	0	0	0	0	0
MIR650	0	0	0	0	0	0	0	0
MIR651	0	0	0	0	0	0	0	0
MIR653	0	0	0	0	0	0	0	0
MIR654	0	0	0	0	0	0	0	0
MIR655	0	0	0	0	0	0	0	0
MIR656	0	0	0	0	0	0	0	0
MIR657	0	0	0	0	0	0	0	0
MIR658	0	0	0	0	0	0	425.091	0
MIR659	0	0	0	0	0	0	0	0
MIR660	0	0	0	0	0	0	0	0
MIR661	0	0	0	0	0	0	NA	0
MIR662	0	0	0	0	0	0	0	0
MIR663A	12862.6	18062	0	0	0	0	10673.3	7479.07
MIR663B	375.68	926.14	0	0	0	0	304.601	144.058
MIR664	0	0	0	0	0	0	0	0
MIR665	0	0	0	0	0	0	0	0
MIR668	0	0	0	0	0	0	0	0
MIR670	0	0	0	0	0	0	0	0
MIR671	NA	NA	NA	NA	NA	NA	NA	NA
MIR675	NA	NA	NA	NA	NA	NA	NA	NA
MIR676	0	0	0	0	0	0	0	0
MIR708	0	0	0	0	0	0	0	0
MIR7-1	0	100.98	0	0	0	0	0	0
MIR711	0	0	0	0	0	0	0	0
MIR718	0	0	0	0	0	0	0	0
MIR7-2	0	0	0	0	0	0	0	0
MIR7-3	0	0	0	0	0	0	0	0
MIR7-3HG	0	0	0	0	0	0	0	0
MIR744	0	0	0	0	0	0	0	0
MIR758	0	0	0	0	0	0	0	0
MIR759	0	0	0	0	0	0	0	0
MIR760	0	0	0	0	0	0	0	0
MIR761	0	0	0	0	0	0	0	0
MIR762	0	0	0	0	0	0	0	0
MIR764	0	0	0	0	0	0	0	0
MIR765	0	0	0	0	0	0	0	0
MIR766	0	0	0	0	0	0	0	0
MIR767	0	0	0	0	0	0	0	0
MIR769	0	0	0	0	0	0	0	0
MIR770	182.11	0	0	0	0	0	228.839	0
MIR802	0	0	0	0	0	0	0	0
MIR873	0	0	0	0	0	0	0	0
MIR874	0	0	0	0	0	0	0	0
MIR875	0	0	0	0	0	0	0	0
MIR876	0	0	0	0	0	0	0	0
MIR877	0	0	0	0	0	0	0	0
MIR885	0	0	0	0	0	0	0	0
MIR888	0	0	0	0	0	0	0	0
MIR889	0	0	0	0	0	0	0	0
MIR890	0	0	0	0	0	0	0	0
MIR891A	0	0	0	0	0	0	0	0
MIR891B	0	0	0	0	0	0	0	0
MIR892A	0	0	0	0	0	0	0	0
MIR892B	0	0	0	0	0	0	0	0
MIR9-1	0	0	0	0	0	0	0	0
MIR9-2	NA	NA	NA	NA	NA	NA	NA	NA
MIR920	0	0	0	0	0	0	0	0
MIR921	0	0	0	0	0	0	0	0
MIR922	NA	NA	NA	NA	NA	NA	NA	NA
MIR92A1	NA	NA	NA	NA	NA	NA	NA	NA
MIR92A2	0	0	0	0	0	0	0	0
MIR92B	0	0	0	0	0	0	0	538.377
MIR93	0	0	0	0	0	0	0	0
MIR9-3	0	0	0	0	0	0	0	0
MIR933	0	0	0	0	0	0	0	0
MIR934	0	0	0	0	0	0	0	0
MIR935	NA	NA	NA	NA	NA	NA	NA	NA
MIR936	0	0	0	0	0	0	0	0
MIR937	0	0	0	0	0	0	0	980.726
MIR938	0	0	0	0	0	0	0	0
MIR939	0	0	0	0	0	0	0	0
MIR940	0	535.82	0	0	0	0	269.502	284.27
MIR941-1	0	0	0	0	0	0	0	0
MIR941-2	0	0	0	0	0	0	0	0
MIR941-3	0	0	0	0	0	0	0	0
MIR941-4	0	0	0	0	0	0	0	0
MIR942	0	0	0	0	0	0	0	0
MIR943	0	0	0	0	0	0	0	0
MIR944	0	0	0	0	0	0	0	0
MIR96	0	0	0	0	0	0	0	0
MIR98	0	0	0	0	0	0	0	0
MIR99A	0	0	0	0	0	0	0	0
MIR99B	0	0	0	0	0	0	0	0
MIRLET7A1	0	0	0	0	0	0	0	0
MIRLET7A2	0	1329.11	0	0	0	0	0	0
MIRLET7A3	NA	NA	NA	NA	NA	NA	NA	NA
MIRLET7B	NA	NA	NA	NA	NA	NA	NA	NA
MIRLET7BHG	0.37	1.47	0.36	1.16	0.674591	1.3182	0.711904	1.48765
MIRLET7C	482.7	0	0	0	0	0	0	0
MIRLET7D	0	0	0	0	0	0	0	0
MIRLET7E	0	0	0	0	0	0	0	0
MIRLET7F1	0	0	0	0	0	0	0	0
MIRLET7F2	0	0	0	0	0	0	0	0
MIRLET7G	0	0	0	0	0	0	0	0
MIRLET7I	0	0	0	0	0	0	607.831	657.226
MLK7-AS1	0.08	0.06	0.08	0.03	0.0140876	0.0177469	0.0480624	0
MLLT4-AS1	0.22	0.12	0.16	0.17	0.227308	0.207883	0.271136	0.178152
MORC2-AS1	0.92	1.11	1.13	1.29	1.19151	1.1909	1.24178	1.50076
MRPL23-AS1	0.01	0.01	0.01	0.03	0	0.0123	0	0.0140529
MRVI1-AS1	0	0.22	NA	0.09	0	0	0.0435028	0
MYLK-AS1	1.15	0.38	0.68	0.66	0.926759	0.606688	1.05903	1.01564
NAV2-AS4	0	0	0	0	0	0	0	0
NOP14-AS1	1.42	1.84	1.3	1.78	1.73968	1.75186	1.71424	2.05479
NPHP3-AS1	0.02	0.01	0.01	0.03	0.0212698	0.0090186	0.0161341	0.0700645
NPPA-AS1	0.62	0.61	0.6	0.68	0.63166	0.733891	0.969136	0.907677
OIP5-AS1	10.24	8.47	10.65	8.82	12.6789	11.8359	12.7614	11.5381
PAN3-AS1	0.85	0.83	0.73	0.96	0.681111	0.620359	0.625074	0.714135
PCBP1-AS1	0.43	0.51	0.26	0.25	0.268187	0.501347	0.445532	0.699726
PCNA-AS1	21.38	15.75	13.58	13.78	13.117	14.5438	16.7704	17.294
PEG3-AS1	0.11	0.18	0	0.08	0.022573	0	0.0212965	0.188306
PPP2R3B-AS1	0.92	1.33	0.92	1.51	0.789891	1.30675	0.676038	1.29588
PROX1-AS1	0	0.01	0	0	0	0.0120939	0.0109454	0
PVRL3-AS1	0.04	0.2	0.08	0.04	0.0689375	0.0887313	0.0973868	0
RAD21-AS1	0.02	0.06	0.01	0.03	0.0180618	0.0224618	0.0304005	0.0246331
RBM26-AS1	0.21	0.19	0.15	0.1	0.226031	0.161776	0.296392	0.148768
RFPL1-AS1	0.08	0.16	0.1	0.13	0.120213	0.400519	0.135686	0.283414
RFPL3-AS1	0.08	0.17	0.14	0.15	0.162591	0.210327	0.234504	0.176904
RNU11	0	0	9.97	0	0	16.5987	0	0
RNU12	0	0	0	0	0	0	0	0
RNU4ATAC	0	0	0	0	0	31.5692	0	0
RNU5D-1	NA	NA	NA	NA	NA	NA	NA	NA
RNU5E-1	0	0	0	0	0	0	0	0
RNU5F-1	0	0	0	0	0	0	0	0
RNU6ATAC	35.59	0	111.79	98.82	27.6204	0	66.5758	28.7779
RNU86	0	0	0	0	0	0	16283.1	0
RNY4	0	0	0	0	0	0	0	0
RNY5	0	0	0	0	0	0	0	0
SAMD12-AS1	0	0.08	0	0	0	0	0	0
SCARNA1	0	0	0	0	0	0	0	0
SCARNA10	0.13	0.31	0.23	0.44	0.122886	0.15304	0	0.168491
SCARNA11	0	0	0	0	0	0	0	0
SCARNA12	6.22	6.74	5.59	2.71	4.12939	3.92028	3.98982	1.51865
SCARNA13	NA	NA	NA	NA	NA	NA	NA	NA
SCARNA14	0	0	0	0	0	0	0	0
SCARNA15	0	0	16.03	0	0	0	0	0
SCARNA16	0.79	3.02	0	1.92	0.782032	1.00532	0.860289	1.08375
SCARNA17	1.45	2.68	2.19	3.63	0.505704	1.42251	0.383252	1.27664
SCARNA18	0	0	0	0	0	0	0	0
SCARNA2	0.43	0.43	0.08	0.1	0	0.287022	0	0.321521
SCARNA20	0	0	0	0	0	0	0	0
SCARNA21	0	0	0	0	0	0	0	0
SCARNA22	0	30.27	0	0	0	0	0	0
SCARNA23	0	0	0	0	0	0	0	0
SCARNA27	0	0	0	0	0	0	0	0
SCARNA3	0	0	0	0	0	0	0	0
SCARNA4	0	0	0	0	0	0	0	0
SCARNA5	0	0	0.18	0	0	0	0.218018	0
SCARNA6	0	0	0.18	0.7	0.186977	0	0.212323	0.264836
SCARNA7	0.13	0	0.97	0.16	0	0.506042	0	0.182724
SCARNA8	0	0	0	0	0	0	0	0
SCARNA9	0.86	1.44	1.25	0.62	0.624821	0.913852	0.816963	0.286162
SCARNA9L	0.11	0	0.38	0	0.104105	0	0	0
SNHG1	34.33	23.47	33.69	23.49	19.5031	14.5245	20.0163	15.6792
SNHG10	5.01	3.81	5.15	4.45	3.97885	3.86762	4.44528	3.55218
SNHG11	6.61	6.75	6.66	6.16	6.51829	6.56975	6.49473	6.91365
SNHG12	17.92	14.2	17.35	13.67	10.2351	6.44965	10.9517	7.6036
SNHG15	15.03	11.67	14.29	10.24	11.9071	9.13697	11.9121	9.01413
SNHG3	23.83	15.66	23.6	15.38	10.959	7.47524	10.9522	7.6215
SNHG4	2.81	2.68	2.94	2.75	0.992994	1.95304	1.83602	1.55309
SNHG5	279.36	16.79	283.76	15.42	259.627	14.7413	257.371	15.6951
SNHG6	96.17	89.3	87.15	77.98	77.2859	64.4219	83.4761	72.134
SNHG7	31.41	16.36	31.86	16.36	31.2691	12.7296	31.8991	14.0966
SNHG8	132.11	50.35	137.01	56.75	95.3218	46.5578	93.9869	42.8286
SNHG9	47.06	45.73	51.92	50.81	53.7382	46.2633	54.4838	54.8379
SNORA1	0	0	0	0	0	0	0	0
SNORA10	11.01	15.33	11.85	17.72	0	0	0	17.8061
SNORA11	0	14.79	0	0	0	0	0	16.9239
SNORA11B	0	0	0	0	0	0	0	0
SNORA11C	0	0	0	0	0	0	0	0
SNORA11E	301.57	317.54	0	64.75	27.2502	37.399	310.762	174.243
SNORA12	4.73	0	0	6.77	5.63935	0	0	7.62644
SNORA13	0	0	0	0	0	0	0	0
SNORA14A	0	0	13.01	0	0	0	0	0
SNORA14B	0	15.1	0	0	0	0	0	17.8248
SNORA15	24.05	16.76	0	0	0	0	75.2346	0
SNORA16A	8.38	11.71	0	0	0	0	9.80419	0
SNORA16B	0	0	0	0	0	0	0	0
SNORA17	NA	NA	NA	NA	NA	NA	NA	NA
SNORA18	62.17	17.24	40.25	39.98	32.565	22.4374	75.9305	20.0134
SNORA19	43.94	0	0	0	0	0	0	0
SNORA20	0	19.88	0	0	0	0	0	0
SNORA21	13.02	0	14.26	21.21	17.1563	0	31.7319	0
SNORA22	8.58	0	0	0	0	0	10.0316	0
SNORA23	0	2.05	0	0	0.838412	0	0	0
SNORA24	25.89	0	14.16	0	0	0	0	0
SNORA25	77.64	89.19	29.84	22.23	0	25.2326	15.9348	62.9584
SNORA26	0	0	0	0	0	0	0	0
SNORA27	0	0	53.86	0	0	0	0	37.0202
SNORA28	0	0	0	0	0	0	0	0
SNORA29	7.63	0	0	0	0	0	9.22535	0
SNORA2A	0	12.94	9.98	29.63	23.5208	0	0	0
SNORA2B	0	0	0	0	0	0	0	0
SNORA3	0	19.03	0	0	0	0	0	22.3367
SNORA30	0	0	0	0	0	0	0	0
SNORA31	0	40.71	0	0	0	0	0	48.7793
SNORA32	0	42.08	0	64.64	157.751	75.9765	0	0
SNORA33	0	0	0	0	0	0	0	0
SNORA34	0	0	7.24	0	8.32712	0	8.25729	0
SNORA35	0	0	0	0	0	0	0	0
SNORA36A	0	0	0	0	0	0	0	0
SNORA36B	0	0	0	0	0	0	0	0
SNORA36C	0	0	0	0	0	0	0	0
SNORA37	0	0	0	0	0	0	0	0
SNORA38	12.49	0	13.57	0	0	0	0	0
SNORA38B	0	0	0	0	0	25.0563	0	0
SNORA39	0	0	0	0	0	0	0	0
SNORA4	9.32	51.57	38.78	0	12.1039	0	11.7481	15.2991
SNORA40	89.95	97.02	89.41	99.38	55.7375	117.665	45.2899	30.0226
SNORA41	0	0	0	0	0	0	0	0
SNORA42	0	15.15	0	17.05	0	0	0	0
SNORA43	NA	NA	NA	NA	NA	NA	NA	NA
SNORA44	12.96	18.04	0	86.7	70.0097	24.3625	15.8134	62.8746
SNORA45	0	0	0	0	0	0	0	18.5342
SNORA46	0	0	0	0	0	0	0	0
SNORA47	0	0	0	0	0	0	0	0
SNORA48	27.96	0	20.03	0	12.2368	0	11.4496	14.8732
SNORA49	0	0	0	0	0	0	0	0
SNORA50	0	0	0	12.88	0	0	0	0
SNORA51	0	0	0	0	0	0	0	0
SNORA52	10.51	29.5	0	16.51	0	0	12.2233	0
SNORA53	1.64	1.72	1.05	0.27	1.30896	0.580486	1.46062	0.632223
SNORA54	0	0	0	0	0	0	0	0
SNORA55	0	0	0	0	0	0	0	0
SNORA56	16.78	0	0	0	0	0	0	0
SNORA57	27.87	5.53	3.92	0	9.54814	0	0	0
SNORA58	0.63	0	0.28	0.37	0.616315	0	0.343945	1.25381
SNORA59A	0	4.15	1.41	0	0	0	0	2.24414
SNORA59B	0	4.15	1.47	0	0	0	0	2.30705
SNORA5A	8.22	0	0	12.85	0	14.4757	20.0093	13.5376
SNORA5B	0	11.68	0	0	0	0	0	0
SNORA5C	0	0	6.33	0	15.025	0	0	10.281
SNORA6	7.19	0	0	5.11	0	5.61858	4.31276	5.66151
SNORA60	0	11.65	0	0	0	0	20.4367	13.5627
SNORA61	43.9	60.69	16.64	24.83	19.5542	27.7984	69.6957	47.0086
SNORA62	0	0	0	0	0	0	0	8.96146
SNORA63	23.55	65.49	56.71	48.54	9.69241	125.57	0	26.1961
SNORA64	11.23	46.62	36.38	0	0	0	13.5271	36.46
SNORA65	7.33	0	7.48	0	0	0	0	0
SNORA66	11.74	0	0	0	0	0	0	0
SNORA67	81.7	37.83	28.22	28.18	22.0133	46.4351	21.451	57.5757
SNORA68	21.96	0	11.93	0	0	0	0	17.9209
SNORA69	11.76	0	0	0	0	0	0	0
SNORA70	126.79	176.7	112.06	121.77	36.6709	68.0826	82.5317	78.8025
SNORA70B	0	0	0	0	0	0	0	0
SNORA70C	0	0	0	0	0	0	0	0
SNORA70D	0	0	0	0	0	0	0	0
SNORA70E	0	0	0	0	0	0	0	0
SNORA70F	0	0	0	0	0	0	0	0
SNORA70G	0	0	0	0	0	0	0	0
SNORA71A	0	0	0	0	0	11.5712	0	0
SNORA71B	0	0	0	0	0	0	0	0
SNORA71C	7.34	0	0	0	0	0	0	0
SNORA71D	0	0	0	0	0	0	0	0
SNORA72	0	16.82	0	19.7	15.9164	0	14.8655	0
SNORA74A	0	0	0	0	0	0	0.653898	0
SNORA74B	0	0	0	0	0	0	0	0
SNORA75	9.52	0	0	0	0	0	0	0
SNORA76	11.7	0	25.06	18.74	0	0	0	18.4717
SNORA77	0	0	0	0	0	0	0	0
SNORA78	18.05	0	0	0	0	0	0	57.285
SNORA79	0	0	0	0	0	0	0	0
SNORA7A	NA	NA	NA	NA	NA	NA	NA	NA
SNORA7B	28.51	10.89	0	0	0	0	8.229	22.2506
SNORA8	39.93	46.44	13.53	0	15.9085	56.2724	23.8082	32.4027
SNORA80	0	0	0	0	0	0	0	0
SNORA80B	9.4	0	0	0	0	0	0	0
SNORA81	4.32	1.4	5.03	2.74	1.16405	0	0	1.60115
SNORA84	10.45	14.45	0	0	0	0	0	0
SNORA9	0	16.29	0	0	0	0	0	18.6418
SNORD10	11.6	0	11.24	5.56	8.71503	0	4.52509	11.8385
SNORD100	566.04	0	0	0	0	0	0	0
SNORD101	0	0	0	0	0	0	0	0
SNORD102	0	0	0	0	0	0	0	0
SNORD103A	150.35	190.46	0	0	0	0	184.241	0
SNORD103B	150.35	190.46	0	0	0	0	184.241	0
SNORD104	920.34	1176.59	0	0	0	0	1185.16	0
SNORD105	0	0	0	0	0	0	0	0
SNORD105B	0	0	0	0	0	0	0	0
SNORD107	NA	NA	NA	NA	NA	NA	NA	NA
SNORD108	NA	NA	NA	NA	NA	NA	NA	NA
SNORD109A	0	1828.3	0	0	0	0	0	2022.9
SNORD109B	0	0	0	0	0	0	0	0
SNORD11	0	0	0	0	0	0	0	0
SNORD110	0	0	0	0	0	0	878.895	0
SNORD111	0	0	0	0	0	0	0	0
SNORD111B	0	0	0	0	0	0	0	0
SNORD113-1	0	0	0	0	0	0	0	0
SNORD113-2	0	0	0	0	0	0	0	0
SNORD113-4	0	0	0	0	0	0	0	1207.45
SNORD113-5	0	0	0	0	0	0	0	0
SNORD113-6	0	0	0	0	0	0	0	0
SNORD113-7	0	0	0	0	0	0	0	0
SNORD113-9	0	0	0	0	0	0	0	0
SNORD114-1	0	0	0	0	0	0	0	0
SNORD114-10	0	0	0	0	0	0	0	0
SNORD114-11	0	0	0	0	0	0	0	0
SNORD114-12	0	0	0	0	0	0	0	0
SNORD114-13	871.59	0	0	0	0	0	0	0
SNORD114-14	0	0	0	0	0	0	910.9	0
SNORD114-15	0	0	0	0	0	0	0	0
SNORD114-16	0	0	0	0	0	0	0	0
SNORD114-17	0	0	0	0	0	0	0	0
SNORD114-18	0	0	0	0	0	0	0	0
SNORD114-19	0	0	0	0	0	0	0	0
SNORD114-2	0	0	0	0	0	0	0	0
SNORD114-20	0	0	0	0	0	0	0	0
SNORD114-21	0	0	0	0	0	0	0	0
SNORD114-22	0	0	0	0	0	0	0	0
SNORD114-23	0	0	0	0	0	0	0	0
SNORD114-24	0	0	0	0	0	0	0	0
SNORD114-25	0	0	0	0	0	0	0	0
SNORD114-26	0	0	0	0	0	0	0	0
SNORD114-27	0	0	0	0	0	0	0	0
SNORD114-28	0	0	0	0	0	0	0	0
SNORD114-29	0	0	0	0	0	0	0	0
SNORD114-3	0	0	0	0	0	0	0	0
SNORD114-30	0	0	0	0	0	0	0	0
SNORD114-31	0	0	0	0	0	0	0	0
SNORD114-4	0	0	0	0	0	0	0	0
SNORD114-5	0	0	0	0	0	0	0	0
SNORD114-6	0	0	0	0	0	0	0	0
SNORD114-7	0	0	0	0	0	0	0	0
SNORD114-8	0	0	0	0	0	0	0	0
SNORD114-9	0	0	0	0	0	0	0	0
SNORD115-1	0	0	0	0	0	0	0	0
SNORD115-10	0	0	0	0	0	0	0	0
SNORD115-11	0	0	0	0	0	0	0	0
SNORD115-12	0	0	0	0	0	0	0	0
SNORD115-13	0	0	0	0	0	0	0	0
SNORD115-14	0	0	0	0	0	0	0	0
SNORD115-15	0	0	0	0	0	0	0	0
SNORD115-16	0	0	0	0	0	0	0	0
SNORD115-17	0	0	0	0	0	0	0	0
SNORD115-18	0	0	0	0	0	0	0	0
SNORD115-19	0	0	0	0	0	0	0	0
SNORD115-2	0	0	0	0	0	0	0	0
SNORD115-20	0	0	0	0	0	0	0	0
SNORD115-21	0	0	0	0	0	0	0	0
SNORD115-22	0	0	0	0	0	0	0	0
SNORD115-23	NA	NA	NA	NA	NA	NA	NA	NA
SNORD115-24	0	0	0	0	0	0	0	0
SNORD115-25	0	0	0	0	0	0	0	0
SNORD115-26	0	0	0	0	0	0	0	0
SNORD115-27	0	0	0	0	0	0	0	0
SNORD115-28	0	0	0	0	0	0	0	0
SNORD115-29	0	0	0	0	0	0	0	0
SNORD115-3	0	0	0	0	0	0	0	0
SNORD115-30	0	0	0	0	0	0	0	0
SNORD115-31	0	0	0	0	0	0	0	0
SNORD115-32	0	0	0	0	0	0	0	0
SNORD115-33	0	0	0	0	0	0	0	0
SNORD115-34	0	0	0	0	0	0	0	0
SNORD115-35	0	0	0	0	0	0	0	0
SNORD115-36	0	0	0	0	0	0	0	0
SNORD115-37	0	0	0	0	0	0	0	0
SNORD115-38	0	0	0	0	0	0	0	0
SNORD115-39	0	0	0	0	0	0	0	0
SNORD115-4	0	0	0	0	0	0	0	0
SNORD115-40	0	0	0	0	0	0	0	0
SNORD115-41	0	0	0	0	0	0	0	0
SNORD115-44	0	0	0	0	0	0	0	0
SNORD115-45	0	0	0	0	0	0	0	0
SNORD115-47	0	0	0	0	0	0	0	0
SNORD115-48	0	0	0	0	0	0	0	0
SNORD115-5	0	0	0	0	0	0	0	0
SNORD115-6	0	0	0	0	0	0	0	0
SNORD115-7	0	0	0	0	0	0	0	0
SNORD115-8	0	0	0	0	0	0	0	0
SNORD115-9	0	0	0	0	0	0	0	0
SNORD116-1	0	0	0	0	0	0	0	0
SNORD116-10	0	0	0	0	0	0	0	0
SNORD116-11	0	0	0	0	0	0	0	0
SNORD116-12	0	0	0	0	0	0	0	0
SNORD116-13	0	0	0	0	0	0	0	0
SNORD116-14	42.42	0	0	0	0	0	0	0
SNORD116-15	42.42	0	0	0	0	0	0	0
SNORD116-16	0	0	0	0	0	0	0	0
SNORD116-18	0	0	0	0	0	0	0	0
SNORD116-19	84.85	0	0	0	0	0	0	0
SNORD116-2	0	0	0	0	0	0	232.872	0
SNORD116-20	42.42	0	0	0	0	0	269.726	316.424
SNORD116-21	0	0	0	0	0	0	0	310.859
SNORD116-22	0	0	0	0	0	0	0	0
SNORD116-23	0	0	0	0	0	0	0	0
SNORD116-24	0	0	0	0	0	0	0	0
SNORD116-25	0	0	0	0	0	0	0	0
SNORD116-26	0	0	0	0	0	0	0	0
SNORD116-27	0	0	0	0	0	0	0	0
SNORD116-28	0	0	0	0	0	0	0	0
SNORD116-29	0	0	0	0	0	0	0	0
SNORD116-3	0	0	0	0	0	0	0	0
SNORD116-4	0	0	0	0	0	0	0	0
SNORD116-5	0	0	0	0	0	0	0	0
SNORD116-7	0	0	0	0	0	0	0	0
SNORD116-8	0	0	0	0	0	0	0	0
SNORD116-9	0	0	0	0	0	0	0	0
SNORD117	0	0	0	0	0	0	0	0
SNORD119	0	0	0	0	0	0	0	0
SNORD11B	0	0	0	0	0	0	0	0
SNORD12	288.35	0	0	0	0	0	0	0
SNORD121A	0	0	0	0	0	0	0	0
SNORD121B	0	0	0	0	0	0	0	0
SNORD123	0	0	0	0	0	0	0	0
SNORD124	0	0	0	0	0	0	0	0
SNORD125	NA	NA	NA	NA	NA	NA	NA	NA
SNORD126	0	0	0	0	0	0	0	0
SNORD127	0	0	0	0	0	0	0	0
SNORD12B	0	168.64	0	0	0	0	0	0
SNORD12C	0	0	0	0	0	0	0	0
SNORD15A	0	0	0	0	0	0	0	0
SNORD15B	0	0	0	0	0	0	0	0
SNORD16	167.57	0	0	0	0	0	0	0
SNORD17	5.14	0.43	3.99	0.81	2.65606	0.419232	6.30494	0.45903
SNORD18A	0	0	0	0	0	0	0	953.369
SNORD18B	0	0	0	0	0	0	0	0
SNORD18C	2248.87	0	0	0	0	0	0	0
SNORD19	0	0	0	0	0	0	0	0
SNORD19B	0	0	0	0	0	0	0	0
SNORD1A	0	1134.62	0	0	0	0	0	0
SNORD1B	0	0	0	0	0	0	0	0
SNORD1C	477.04	0	0	0	0	0	0	0
SNORD2	0	0	0	0	0	0	1324.2	0
SNORD20	0	0	0	0	0	0	0	0
SNORD21	0	0	0	0	0	0	0	0
SNORD22	158.37	21.54	111.3	54.73	21.934	0	75.6533	26.3253
SNORD23	231.94	0	0	0	0	0	185.017	116.364
SNORD24	0	0	0	0	0	0	0	0
SNORD25	0	0	0	0	0	0	0	0
SNORD26	665.05	862.27	0	0	0	0	0	0
SNORD27	791.77	0	0	0	0	0	0	0
SNORD28	1335.76	0	0	0	0	0	0	0
SNORD29	0	0	0	0	0	0	0	0
SNORD30	0	0	0	0	0	0	0	0
SNORD31	0	0	0	0	0	0	0	1718.1
SNORD32A	695.13	0	0	0	0	0	471.527	0
SNORD32B	0	0	0	0	0	0	0	0
SNORD33	654.72	840.37	0	0	0	0	399.35	0
SNORD34	1714.9	0	0	0	0	0	0	0
SNORD35A	747.51	0	0	0	0	0	0	0
SNORD35B	0	0	0	0	0	0	431.433	0
SNORD36A	0	2985.8	0	0	0	0	997.638	2209.04
SNORD36B	0	1044.78	0	0	0	0	0	0
SNORD36C	0	2170.9	0	0	0	0	0	0
SNORD37	0	0	0	0	0	0	0	2375.45
SNORD38A	0	0	0	0	0	0	0	0
SNORD38B	0	0	0	0	0	0	0	0
SNORD41	0	0	0	0	0	0	0	0
SNORD42A	0	0	0	0	0	0	0	0
SNORD42B	0	0	0	0	0	0	0	0
SNORD43	0	0	0	0	0	0	0	0
SNORD44	0	0	0	0	0	0	0	0
SNORD45A	0	551.09	0	0	0	0	0	0
SNORD45B	0	0	0	0	0	0	0	0
SNORD45C	607.91	783.36	0	0	0	0	0	0
SNORD46	147.96	0	0	0	0	0	0	0
SNORD47	3841.22	4123.29	0	0	0	0	858.856	3761.37
SNORD48	0	0	0	0	0	0	0	0
SNORD49A	0	0	0	0	0	0	0	0
SNORD49B	0	0	0	0	0	0	0	0
SNORD4A	0	0	0	0	0	0	0	961.475
SNORD4B	0	0	0	0	0	0	0	0
SNORD5	0	0	0	0	0	0	0	0
SNORD50A	0	0	0	0	0	0	0	0
SNORD50B	958.02	0	0	0	0	0	1255.9	0
SNORD51	0	0	0	0	0	0	0	0
SNORD52	1708.04	0	0	0	0	0	0	0
SNORD53	0	0	0	0	0	0	0	0
SNORD54	2456.09	0	0	0	0	0	0	0
SNORD55	1273.78	0	0	0	0	0	798.258	908.773
SNORD56	0	0	0	0	0	0	1220.77	1335.89
SNORD56B	0	0	0	0	0	0	0	0
SNORD57	0	992.5	0	0	0	0	0	0
SNORD58A	0	0	0	0	0	0	0	0
SNORD58B	NA	NA	NA	NA	NA	NA	NA	NA
SNORD58C	316.69	401.43	0	0	0	0	422.428	464.422
SNORD59A	0	0	0	0	0	0	0	0
SNORD59B	0	0	0	0	0	0	0	0
SNORD6	0	0	0	0	0	0	0	0
SNORD60	0	0	0	0	0	0	0	0
SNORD61	0	0	0	0	0	0	0	0
SNORD62A	0	0	0	0	0	0	0	0
SNORD63	0	0	0	0	0	0	0	0
SNORD64	NA	NA	NA	NA	NA	NA	NA	NA
SNORD65	0	0	0	0	0	0	0	0
SNORD66	0	0	0	0	0	0	0	0
SNORD67	0	0	0	0	0	0	0	0
SNORD68	927.25	0	0	0	0	0	1213.22	0
SNORD69	0	0	0	0	0	0	0	0
SNORD7	0	0	0	0	0	0	0	0
SNORD70	0	0	0	0	0	0	0	0
SNORD71	0	0	0	0	0	0	0	0
SNORD72	0	0	0	0	0	0	0	0
SNORD73A	0	2055.43	0	0	0	0	0	0
SNORD74	0	0	0	0	0	0	0	0
SNORD75	0	0	0	0	0	0	0	0
SNORD76	0	620.23	0	0	0	0	0	722.069
SNORD77	0	0	0	0	0	0	0	0
SNORD78	0	0	0	0	0	0	0	0
SNORD79	963.68	1835.57	0	0	0	0	0	731.572
SNORD8	0	0	0	0	0	0	0	0
SNORD80	4216.02	2731.79	0	0	0	0	0	0
SNORD81	0	0	0	0	0	0	0	0
SNORD82	0	0	0	0	0	0	0	0
SNORD83A	206.39	0	0	0	0	0	0	0
SNORD83B	0	0	0	0	0	0	269.318	0
SNORD84	0	0	0	0	0	0	0	0
SNORD85	0	0	0	0	0	0	0	0
SNORD86	NA	NA	NA	NA	NA	NA	NA	NA
SNORD87	0	0	0	0	0	0	0	0
SNORD88A	0	0	0	0	0	0	0	0
SNORD88B	0	0	0	0	0	0	174.158	195.415
SNORD88C	0	0	0	0	0	0	0	0
SNORD89	0	0	0	0	0	0	114.219	0
SNORD9	0	0	0	0	0	0	0	0
SNORD90	0	0	0	0	0	0	0	0
SNORD91A	0	0	0	0	0	0	0	0
SNORD91B	0	0	0	0	0	0	0	0
SNORD92	0	0	0	0	0	0	0	0
SNORD93	0	0	0	0	0	0	0	0
SNORD94	15.69	0	8.32	0	0	0	0	0
SNORD95	0	0	0	0	0	0	0	0
SNORD96A	803.46	0	0	0	0	0	0	0
SNORD96B	0	0	0	0	0	0	0	0
SNORD97	18	8.27	0	8.97	0	0	0	0
SNORD98	0	0	0	0	0	0	0	0
SNORD99	505.21	0	0	0	0	0	0	0
TERC	0.57	0.21	0.29	0	0.381329	0.443233	0.611269	0.100615
VTRNA1-1	0	0	0	0	0	0	0	0
VTRNA1-2	0	0	0	0	0	0	0	1529.7
VTRNA1-3	732.85	1420.02	0	0	0	0	1430.95	1070.63
VTRNA2-1	0	387.28	0	0	0	0	0	0
